# Supplementary material for: Cross-sectional analysis of sleep-promoting and wake-promoting drug use on health, fatigue-related error, and near-crashes in police officers
Source: PubMed Central journal article supplement — BMJ Open. 2018 Sep 19;8(9):e022041. doi: 10.1136/bmjopen-2018-022041 (PMC6150149; doi:10.1136/bmjopen-2018-022041), 2018-09-19
Supplement: bmjopen-2018-022041.draft_revisions.pdf [file bmjopen-2018-022041.draft_revisions.pdf]

# BMJ Open

BMJ Open is committed to open peer review. As part of this commitment we make the peer review history of every article we publish publicly available.

When an article is published we post the peer reviewers' comments and the authors' responses online. We also post the versions of the paper that were used during peer review. These are the versions that the peer review comments apply to.

The versions of the paper that follow are the versions that were submitted during the peer review process. They are not the versions of record or the final published versions. They should not be cited or distributed as the published version of this manuscript.

BMJ Open is an open access journal and the full, final, typeset and author-corrected version of record of the manuscript is available on our site with no access controls, subscription charges or pay-per-view fees (<http://bmjopen.bmj.com>).

If you have any questions on BMJ Open's open peer review process please email [info.bmjopen@bmj.com](mailto:info.bmjopen@bmj.com)

# BMJ Open

## Sleep- and wake-promoting drug use and health and safety outcomes in police officers

|                               |                                                                                                                                                                                                                                                                                                                                                                                                                                                                                                                                                                                                                                                                                                                                                                                                                                                                                                                                                                                                                                                                                                                                                                                                                                                                                                                                                                                                                                                                                                                                                                                                                                                                                                                                                                                        |
|-------------------------------|----------------------------------------------------------------------------------------------------------------------------------------------------------------------------------------------------------------------------------------------------------------------------------------------------------------------------------------------------------------------------------------------------------------------------------------------------------------------------------------------------------------------------------------------------------------------------------------------------------------------------------------------------------------------------------------------------------------------------------------------------------------------------------------------------------------------------------------------------------------------------------------------------------------------------------------------------------------------------------------------------------------------------------------------------------------------------------------------------------------------------------------------------------------------------------------------------------------------------------------------------------------------------------------------------------------------------------------------------------------------------------------------------------------------------------------------------------------------------------------------------------------------------------------------------------------------------------------------------------------------------------------------------------------------------------------------------------------------------------------------------------------------------------------|
| Journal:                      | <i>BMJ Open</i>                                                                                                                                                                                                                                                                                                                                                                                                                                                                                                                                                                                                                                                                                                                                                                                                                                                                                                                                                                                                                                                                                                                                                                                                                                                                                                                                                                                                                                                                                                                                                                                                                                                                                                                                                                        |
| Manuscript ID                 | bmjopen-2018-022041                                                                                                                                                                                                                                                                                                                                                                                                                                                                                                                                                                                                                                                                                                                                                                                                                                                                                                                                                                                                                                                                                                                                                                                                                                                                                                                                                                                                                                                                                                                                                                                                                                                                                                                                                                    |
| Article Type:                 | Research                                                                                                                                                                                                                                                                                                                                                                                                                                                                                                                                                                                                                                                                                                                                                                                                                                                                                                                                                                                                                                                                                                                                                                                                                                                                                                                                                                                                                                                                                                                                                                                                                                                                                                                                                                               |
| Date Submitted by the Author: | 31-Jan-2018                                                                                                                                                                                                                                                                                                                                                                                                                                                                                                                                                                                                                                                                                                                                                                                                                                                                                                                                                                                                                                                                                                                                                                                                                                                                                                                                                                                                                                                                                                                                                                                                                                                                                                                                                                            |
| Complete List of Authors:     | <p>Ogeil, Rowan; Monash University, Eastern Health Clinical School; Harvard Medical School, Division of Sleep and Circadian Disorders, Departments of Medicine and Neurology, Brigham and Women's Hospital; Division of Sleep Medicine</p> <p>Barger, Laura; Brigham and Women's Hospital, Division of Sleep and Circadian Disorders; Harvard Medical School, Division of Sleep and Circadian Disorders, Departments of Medicine and Neurology, Brigham and Women's Hospital; Division of Sleep Medicine</p> <p>Lockley, Steven; Monash University, Monash Institute of Cognitive and Clinical Neurosciences and School of Psychological Sciences; Harvard Medical School, Division of Sleep and Circadian Disorders, Departments of Medicine and Neurology, Brigham and Women's Hospital; Division of Sleep Medicine</p> <p>O'Brien, Conor; Brigham and Women's Hospital, Division of Sleep and Circadian Disorders</p> <p>Sullivan, Jason; Brigham and Women's Hospital, Division of Sleep and Circadian Disorders</p> <p>Qadri, Salim; Brigham and Women's Hospital, Division of Sleep and Circadian Disorders</p> <p>Lubman, D; Monash University, Eastern Health Clinical School</p> <p>Czeisler, Charles; Brigham and Women's Hospital, Division of Sleep and Circadian Disorders; Harvard Medical School, Division of Sleep and Circadian Disorders, Departments of Medicine and Neurology, Brigham and Women's Hospital; Division of Sleep Medicine</p> <p>Rajaratnam, Shantha M. W.; Monash University, Monash Institute of Cognitive and Clinical Neurosciences and School of Psychological Sciences; Harvard Medical School, Division of Sleep and Circadian Disorders, Departments of Medicine and Neurology, Brigham and Women's Hospital; Division of Sleep Medicine</p> |
| Keywords:                     | MENTAL HEALTH, shift work, drug use, health, performance, safety                                                                                                                                                                                                                                                                                                                                                                                                                                                                                                                                                                                                                                                                                                                                                                                                                                                                                                                                                                                                                                                                                                                                                                                                                                                                                                                                                                                                                                                                                                                                                                                                                                                                                                                       |
|                               |                                                                                                                                                                                                                                                                                                                                                                                                                                                                                                                                                                                                                                                                                                                                                                                                                                                                                                                                                                                                                                                                                                                                                                                                                                                                                                                                                                                                                                                                                                                                                                                                                                                                                                                                                                                        |

SCHOLARONE™  
Manuscripts

**Sleep- and wake-promoting drug use and health and safety outcomes in police officers**

1  
2  
3  
4  
5 Rowan P. Ogeil, Ph.D.<sup>1,2,3</sup>, Laura K. Barger, Ph.D.<sup>1,2</sup>, Steven W. Lockley, Ph.D.<sup>1,2,4</sup>, Conor S. O'Brien,  
6 B.A.<sup>1</sup>, Jason P. Sullivan, B.S.<sup>1</sup>, Salim Qadri, B.S.<sup>1</sup>, Dan I. Lubman, MB ChB, Ph.D.<sup>3</sup>, Charles A. Czeisler,  
7 Ph.D., M.D.<sup>1,2</sup>, Shantha M.W. Rajaratnam, Ph.D.<sup>1,2,4</sup>  
8  
9  
10  
11  
12

13 <sup>1</sup> Division of Sleep and Circadian Disorders, Departments of Medicine and Neurology, Brigham and  
14 Women's Hospital, Boston MA, USA.  
15

16 <sup>2</sup> Division of Sleep Medicine, Harvard Medical School, Boston MA, USA.  
17

18 <sup>3</sup> Eastern Health Clinical School, Monash University, Box Hill VIC, Australia and Turning Point,  
19 Eastern Health, Fitzroy VIC, Australia.  
20

21 <sup>4</sup> Monash Institute of Cognitive and Clinical Neurosciences, School of Psychological Sciences,  
22 Monash University, Clayton VIC, Australia.  
23  
24  
25  
26  
27

**Address for Correspondence:**

28  
29 Rowan P. Ogeil, Ph.D.

30  
31 Turning Point, 54-62 Gertrude St., Fitzroy 3065 VIC, Australia

32  
33 Telephone: +613 8413 8469

34  
35 Fax: +613 9416 3420

36  
37 Email: Rowan.Ogeil@monash.edu  
38  
39  
40

41 **Word Count:** 3168  
42  
43  
44  
45  
46  
47  
48  
49  
50  
51  
52  
53  
54  
55  
56  
57  
58  
59  
60

**Abstract**

1 **Objectives:** To examine sleep- and wake-promoting drug use in police officers, and associations  
2 between use of these drugs and health, performance, and safety outcomes, both alone and in  
3 combination with night-shift work.  
4

5 **Design:** Cross-sectional survey.  
6

7 **Setting:** Police officers from North America completed the survey either on-line or on-site.  
8

9 **Participants:** 4957 police participated in the survey, 3693 online and 1264 on-site.  
10

11 **Main outcome measures:** Sleep and wake-promoting drug use, self-reported excessive sleepiness,  
12 near-miss motor vehicle crashes, dozing while driving, errors made while at work, stress, and  
13 burnout.  
14

15 **Results:** Over the past month, 20% of police officers reported using sleep-promoting drugs and  
16 drugs causing sleepiness, while wake-promoting agents were used by 28% of police (5% used  
17 wake-promoting drugs, 23% used high levels of caffeine, and 4% smoked to stay awake). Use of  
18 sleep-promoting drugs was associated with increased near-crashes (OR=1.61; 95% confidence  
19 interval [CI]: 1.21 to 2.13), work-related errors (OR=1.75; 95% CI: 1.32 to 2.79), higher stress  
20 (OR=1.41; 95% CI: 1.10 to 1.82) and higher burnout (OR=1.83; 95% CI: 1.40 to 2.38). Wake-  
21 promoting medication use, high caffeine use and smoking to stay awake were associated with  
22 increased odds of a fatigue-related error, stress and burnout (ORs ranging from 1.68 to 2.56).  
23 Caffeine consumption was common, and while smoking was not, of those participants who did  
24 smoke, one-in-three did so to remain awake. Night-shift work was associated with independent  
25 increases in risk for excessive sleepiness, near-crashes and fatigue-related errors. Interactions  
26 between night-shift work and wake-promoting drug use were also found for excessive sleepiness.  
27  
28  
29  
30

31 **Conclusions:** Police who use sleep- and wake-promoting drugs, especially when working night  
32 shifts, are most vulnerable to adverse health, performance and safety outcomes. Future research  
33 should examine temporal relationships between shift-work, drug use and adverse outcomes, in  
34 order to develop optimal alertness management strategies combining behavioural and  
35 pharmacological countermeasures.  
36  
37

38 **Keywords:** Mental health; shift work; drug use, health, performance, safety.  
39  
40  
41  
42  
43  
44  
45  
46  
47  
48  
49  
50  
51  
52  
53  
54  
55  
56  
57  
58  
59  
60

**Strengths and limitations of this study:**

- Examines the contribution of both use of sleep- and wake-promoting drugs and shift schedules on health, performance and safety outcomes.
- Data were obtained from a large sample of North American police officers.
- Self-assessment of health, performance and safety outcomes was used, which may be subject to a bias not to report.
- The retrospective design employed may have been affected by recall or social desirability bias.

For peer review only

## Introduction

1 Sleep problems adversely impact the physical and mental health of individuals, and place a high  
2 economic and health care burden on the community.<sup>1</sup> Poorer health outcomes among those who  
3 work non-standard shifts include an increased prevalence of chronic sleep disorders, mood  
4 disturbance, cardiovascular disease, and diabetes.<sup>2</sup>

5  
6  
7 Shift-work disorder is characterised by insomnia and/or excessive daytime sleepiness associated  
8 with work schedules.<sup>3</sup> Between 8 and 14% of shift workers meet the clinical criteria for a diagnosis  
9 of shift-work disorder, with rates as high as 26% reported in those working rotating shifts.<sup>2</sup> The  
10 incidence of shift-work disorder is likely underestimated, however, given that the symptoms which  
11 define the disorder are common to many sleep disorders, and most shift workers will experience  
12 some adverse consequences as a result of opposing circadian physiology to sleep at night, and to  
13 be awake during the day.<sup>2</sup> As an occupational group, police provide services 24-hours a day, with  
14 officers required to work overnight shifts. Shift-work disorder in both police and other  
15 professionals is associated with adverse consequences including an increased propensity for work  
16 related errors, decrements in performance and increase incidence of motor vehicle crashes or  
17 near-crashes.<sup>3,4</sup>

18  
19  
20  
21 The majority of shift workers do not adapt to the shifted sleep-wake schedule required for their  
22 work,<sup>5</sup> and our understanding of those workers who may be more vulnerable or resistant to shift-  
23 work disorder is limited.<sup>6</sup> Circadian misalignment between internally driven physiological  
24 processes and the light-dark cycle has been proposed as the mechanism which underlies poorer  
25 physical and mental health observed in shift workers.<sup>7</sup> Kalmbach et al.<sup>8</sup> reported that those who  
26 develop shift-work disorder report greater levels of anxiety and depression compared to shift  
27 workers who do not. These negative effects were further compounded in shift workers with  
28 circadian systems that were slower to adapt to changes associated with work-shifts, suggesting  
29 that while the biological clock is unable to adapt to the demands imposed by shift-work, that there  
30 are likely trait and state characteristics of individuals that are associated with greater impairment  
31 or resilience to health and performance effects following night-shift work.

32  
33  
34  
35 Hitherto, research examining shift schedules and effects on health and performance outcomes has  
36 generally not considered the use of sleep- and wake-promoting drugs. While 1 in 10 adults in the  
37 general population have used alcohol as a sleep aid, recent data suggest higher rates of  
38 consumption in shift workers with one in six consuming alcohol to help initiate sleep between  
39 shifts.<sup>9</sup> Indeed, following prescription sleep medications (e.g., benzodiazepines), alcohol is also  
40 commonly used as sleeping aid by shift workers.<sup>10</sup> High alcohol or continued use of prescription  
41 sleeping aids is of concern given that their long-term use is associated with poor health and public  
42 health outcomes.<sup>11,12</sup> For example, Roche et al.<sup>13</sup> reported that high-risk drinkers are 22 times  
43 more likely than low-risk drinkers to be absent from work due to alcohol use, placing a large  
44 burden on the economy due to lost productivity.

45  
46  
47  
48 Common wake-promoting medications used by shift workers include freely available stimulants  
49 (e.g., caffeine and nicotine),<sup>14</sup> in addition to medication obtained via prescription, over-the-  
50 counter or as a supplement. A Cochrane review that examined pharmacological product efficacy  
51 for shift work disorder found mixed to limited efficacy of wake-promoting agents including  
52 modafinil and caffeine.<sup>15</sup> As with sleep-promoting medication, there may be negative  
53 consequences that accompany continued use of stimulants. For example, reliance on caffeine has  
54 been associated with poorer sleep quality, increased levels of daytime dysfunction, and increased  
55  
56  
57

levels of night time disturbance, whereas nicotine dependence has been associated with poorer sleep quality and increased use of sleep medication and sleep disturbances.<sup>14</sup>

This study investigated the use of the sleep- and wake-promoting drugs and their associations with night shift work and performance and safety indices, including errors made at work and near-crash events.

## Methods

### *Participants*

Police officers in North America were recruited to participate in a cross-sectional study either online ( $n=3693$ ) or on-site ( $n=1264$ ). A total of 4957 officers completed the survey, a cooperation rate of 63.1% in the on-site cohort and a 91.9%, participation rate in the online sample. Further details of the sample have been described previously.<sup>4</sup>

The protocol was approved by the Partners and Monash Human Research Ethics Committees. Participants provided written or electronic informed consent and were not informed about study hypotheses.

### *Materials and Survey Instruments*

In the survey, participants completed sections on demographics, sleep-promoting drug use (alcohol, prescription sleep medication, over the counter (OTC) or herbal medication, medication that listed sleepiness as a side-effect), and wake-promoting drug use (caffeine, cigarettes, prescribed medication, OTC/herbal medication).

The survey also contained questions about health, performance and safety outcomes over the past month. Stress was assessed with a Likert-type scale asking participants to rate their level of stress from 1 (not at all stressful) to 7 (very stressful) over the past month. The Maslach Burnout inventory (sensitivity 0.70, specificity 0.57)<sup>16</sup> is a 22 question, validated questionnaire. The emotional exhaustion subscale contains 9-items and was used to assess burnout that develops in response to chronic occupational stress.<sup>17</sup> Excessive sleepiness was assessed using the Epworth Sleepiness Scale (ESS) (sensitivity 0.94, specificity 1.00).<sup>18</sup> Performance was assessed with the questions, "In the last month, do you believe sleep deprivation or fatigue caused you to make a mistake or be unnecessarily unsafe in some way?" and "In the last month, do you believe you made a mistake or were unnecessarily unsafe in some way for reasons other than sleep deprivation or fatigue?" To assess motor vehicle safety following a shift the following questions were used: "In the last month, did you have any near miss motor vehicle accidents or crashes (narrowly avoided property damage or bodily harm) in which you were driving?", "How likely are you to doze off...: While driving, after you worked a night shift?" and "How likely are you to doze off...: While driving, after you worked a day or evening shift?" Night shifts were defined as having worked 3 or more 8-10 hour shifts between 10 PM and 8 AM or 12 hour shifts between 7 PM and 9 AM).

### *Data Analyses*

Chi-square analyses were used to compare police who had used versus those who had not used each sleep and wake-promoting drug on outcome variables in the past month. Outcomes considered were excessive daytime sleepiness (ESS scores exceeding 10); any near-miss crashes or dozing reported following a work shift, any errors made while at work, and levels of stress (1-7 on







workers. Relationships between drug use and poor outcomes remained significant even after controlling for common sleep disorders.<sup>19,20</sup>

While we did not ask police officers about their use of specific classes of sleep-promoting medication, the use of benzodiazepines is common in the United States, with a retrospective study reporting that one-in-twenty adults had been prescribed a drug from this class during 2008.<sup>20</sup> While short-term use is recommended within clinical guidelines to ameliorate insomnia, benzodiazepine use has been associated with impairment of driving performance,<sup>21</sup> with a single dose of lorazepam causing greater lane deviations compared with alcohol intoxication of .05% BAC.<sup>22</sup> In addition, triazolam causes residual next day decrements in driving performance,<sup>23</sup> and benzodiazepines with a long half-life, commonly prescribed as anxiolytics have also been associated with increased risk of a motor crash.<sup>21</sup> This is important given the increased rates of stress and burnout reported by police who used sleep-promoting medication in the present study, and previously reported decreases in quality of life and depression symptoms in nurses reported to have used hypnotic drugs.<sup>24</sup> Police using sleep-promoting medication were also more likely to report an error at work attributable to fatigue. Procedural errors and injuries at work associated with use of hypnotic drugs have also been reported in nurses<sup>24</sup>. Such effects may result from a desire to overcome sleepiness or anxiety (given the ESS and high stress reported by police in this sample), or reflect rebound or next day-effects.

More than 20% of police used a high level of caffeine (>400mg/day), and more than 5% used a medication or over-the-counter drug to promote wakefulness (excluding caffeine) in the past month. Of those who smoked, a third reported doing so to remain awake. Wake-promoting agents may be used by shift-workers in order to maintain vigilance and alertness on-shift; however, evidence on their efficacy is mixed.<sup>15</sup> Previous studies have suggested that modafinil may have cognitive enhancing effects following sleep deprivation, including in those engaged in simulated night-shift work.<sup>25</sup> Other reports have suggested increases in some measures of simulated driving performance specifically lane deviation, but not speed deviation or off-road incidents following modafinil suggesting caution with its use as a countermeasure for sleepiness.<sup>26</sup> Our study suggests use of these drugs is associated with decrements in performance, and increased levels of stress/burnout that may be related to changes in shift schedule, particularly given the interaction between use of wake-promoting medication and night-shift work significantly increasing the odds of excessive levels of daytime sleepiness.

Use of common and licit stimulants was common amongst police in our sample, and moderate caffeine consumption (e.g., up to 250mg) has been proposed as a countermeasure to increase performance during night-shift work by the National Sleep Foundation.<sup>27</sup> Dependence on caffeine has been associated with negative consequences, however, including poorer sleep quality and increased daytime dysfunction.<sup>14</sup> In our study, high caffeine users (>400mg)<sup>19</sup> were more likely to report a fatigue-related error or near-miss crash in the present study. These findings are consistent with a previous report that caffeine is the most prevalent stimulant in fatal-to-the-driver heavy truck crashes.<sup>28</sup> While use of caffeine in moderate levels may protect against sleepiness-related errors at work, exceeding these levels is associated with detrimental health and performance impacts. Our results suggest that high caffeine use may be an important marker of vulnerability to excessive sleepiness and performance impairment.

Although the majority of police in our sample were non-smokers, of those who smoked, almost one-in-three reported smoking in order to stay awake. Smoking rates are reportedly higher in night-shift workers, with rates of uptake that are significantly greater in shift workers compared to

1 traditional day workers.<sup>29</sup> Indeed, lung cancer rates of rotating shift workers are significantly  
2 greater in current smokers.<sup>30</sup> In addition, dependence upon nicotine has been associated with  
3 numerous adverse health effects, including poorer sleep.<sup>14</sup> Police in our sample who reported  
4 smoking in order to remain awake reported greater levels of daytime sleepiness, increased  
5 propensity to make fatigue-related errors and higher levels of stress and burnout, even compared  
6 with smokers who did not engage in this behaviour. As was the case with those officers reporting  
7 high caffeine consumption, it may be that these users are vulnerable to the effects of shift work,  
8 and are using high levels of these stimulants as a countermeasure against this vulnerability. This  
9 may at least in part explain the previous finding that smoking rates are higher in night-shift  
10 workers compared to day workers<sup>29</sup>.

12 Recent work has called for further research to understand the inter-individual variability in sleep-  
13 wake responses to shift work in order to identify those vulnerable or resilient to assist them in  
14 managing shifts.<sup>6</sup> The present study suggests that excessive use of sleep- or wake-promoting  
15 medication may be one such trait, given higher rates of use in those formally diagnosed with shift-  
16 work disorder. Our models found that both night-shift work and use of sleep-promoting  
17 medication were associated with increased odds of both high caffeine use and smoking to stay  
18 awake, with high use of each of these drugs associated with adverse health and safety outcomes.  
19 In addition to organisational efforts to promote shift-work schedules associated with better health  
20 and safety outcomes,<sup>2</sup> individual differences in the vulnerability to sleepiness caused by shift work  
21 should also be considered, recognising that excessive use of pharmacological countermeasures  
22 should not be considered the first-line management approach in such cases. A possible approach  
23 to assess the extent of sleepiness in shift work, and the role that artificial stimulants play in  
24 enabling shift-work or extended duration work shifts, is to raise the question: What would happen  
25 to workplace sleepiness, safety and productivity if caffeine use was not permitted?  
26  
27  
28  
29

### 30 *Limitations and Future Research*

31 The present study used self-assessment of the primary health and performance outcomes, and  
32 may be subject to a bias not to report, given the consequences of work-related errors associated  
33 with police work. Previous studies using both cross-sectional and prospective designs have  
34 reported similar levels of outcomes as reported here, however, including in occupational groups  
35 such as police where errors can have large negative impacts.<sup>4</sup> The retrospective nature of the drug  
36 use questionnaires may have been affected by recall bias, or a social desirability bias given the  
37 lower response rates to some of the drug use questions. Despite this, we still found significant  
38 associations between the use of sleep- and wake-promoting drugs and health and performance  
39 outcomes. Future studies should incorporate amount and frequency estimates of drug and  
40 medication use, as well as eliciting more information about specific drug classes used to better  
41 understand these associations.  
42  
43  
44  
45

### 46 *Conclusion*

47 Shift work is pervasive in society, enabling essential services to be provided around the clock, but  
48 also due to the rapid growth in flexible working arrangements. We found that over and above the  
49 effects of working night-shifts, use of sleep- and wake-promoting drugs was associated with  
50 detrimental health, performance and safety outcomes. In the past month, one-in-five police  
51 officers reported using a sleep-promoting drug, or drug that listed sleepiness as a side-effect, and  
52 almost one-in-three used a wake promoting drug, high caffeine levels, or smoking cigarettes to  
53 stay awake. Examining patterns of drug use among shift-workers may provide useful markers of  
54 vulnerability to shift work to form the basis for personalised intervention strategies.  
55  
56  
57  
58  
59  
60

1  
2  
3  
4  
5  
6  
7  
8  
9  
10  
11  
12  
13  
14  
15  
16  
17  
18  
19  
20  
21  
22  
23  
24  
25  
26  
27  
28  
29  
30  
31  
32  
33  
34  
35  
36  
37  
38  
39  
40  
41  
42  
43  
44  
45  
46  
47  
48  
49  
50  
51  
52  
53  
54  
55  
56  
57  
58  
59  
60

For peer review only

**Footnotes:**

1 **Contributors:** RO, LB, SL, CO, JS, CC and SR conceived the research question and study design. LB,  
2 SL, CC and SR obtained funding for data collection. LB, SL, CO, JS, SQ, CC and SR acquired the data.  
3 RO, LB, SL, JS, DL, CC and SR analysed and/or interpreted data from the study. RO drafted the  
4 initial manuscript, with critical revision and important intellectual content provided by RO, LB, SL,  
5 CO, JS, SQ, DL, CC and SR. Administrative, technical or material support was provided by CO, JS,  
6 and SQ. Study supervision was provided by LB, CO, JS, CC and SR.  
7  
8

9 **Funding:** This study was supported by grant 2004-FS-BX-0001 and grant 2010C-10002 from the  
10 National Institute of Justice, Office of Justice Programs, US Department of Justice; grants R01  
11 OH008496 and R01 OH009403 from the Centers for Disease Control and Prevention. RPO was  
12 supported by a Harvard Club of Australia Fellowship, and is the recipient on an NHMRC Peter  
13 Doherty award. LKB was supported in part by grant R01 OH 010300 from the National Institute of  
14 Occupational Safety and Health.  
15  
16

17 **Competing interests:** None declared. Funders had no role in the study design, data collection, data  
18 analysis, data interpretation, or writing of the report.  
19

20 **Ethical approval:** The protocol was approved by the Partners and Monash Human Research Ethics  
21 Committees. Participants provided written or electronic informed consent and were not informed  
22 about study hypotheses.  
23  
24

25 **Data sharing statement:** The data that support the findings of this study are available from the  
26 authors upon reasonable request.  
27  
28  
29  
30  
31  
32  
33  
34  
35  
36  
37  
38  
39  
40  
41  
42  
43  
44  
45  
46  
47  
48  
49  
50  
51  
52  
53  
54  
55  
56  
57  
58  
59  
60

## References

1. Institute of Medicine (US) Committee on Sleep Medicine and Research. Functional and economic impact of sleep loss and sleep-related disorders. In: Colten HR, Altevogt BM, Eds. Sleep disorders and sleep deprivation: an unmet public health problem. National Academies Press (US), Washington DC; 2006.
2. Drake CL, Roehrs T, Richardson G, Walsh JK, Roth T. Shift work sleep disorder: prevalence and consequences beyond that of symptomatic day workers. *Sleep* 2004; **27**: 1453–62.
3. Barger LK, Ogeil RP, Drake CL, O'Brien CS, Ng KT, Rajaratnam SM. Validation of a questionnaire to screen for shift work disorder. *Sleep* 2012; **35**: 1693–1703.
4. Rajaratnam SMW, Barger LK, Lockley SW, Shea SA, Wang W, Landrigan CP, et al. Sleep disorders, health, and safety in police officers. *JAMA* 2011; **306**: 2567–78.
5. Czeisler CA, Johnson MP, Duffy JF, Brown EN, Ronda JM, Kronauer RE. Exposure to bright light and darkness to treat physiologic maladaptation to night work. *N Engl J Med* 1990; **322**: 1253–9.
6. Van Dongen HPA. Shift work and inter-individual differences in sleep and sleepiness. *Chronobiol Int* 2006; **23**: 1139–47.
7. Åkerstedt T, Wright KP. Sleep loss and fatigue in shift work and shift work disorder. *Sleep Med Clin* 2009; **4**: 257–71.
8. Kalmbach DA, Pillai V, Cheng P, Arnedt JT, Drake CL. Shift work disorder, depression, and anxiety in the transition to rotating shifts: the role of sleep reactivity. *Sleep Med* 2015; **16**: 1532–8.
9. Dorrian J, Heath G, Sargent C, Banks S, Coates A. Alcohol use in shiftworkers. *Accid Anal Prev* 2017; **99**:395–400.
10. Dorrian J, Lamond N, van den Heuvel C, Pincombe J, Rogers AE, Dawson D. A pilot study of the safety implications of Australian nurses' sleep and work hours. *Chronobiol Int* 2006; **23**: 1149–63.
11. Schuckit MA. Alcohol-use disorders. *Lancet* 2009; **373**: 492–501.
12. Room R, Babor T, Rehm J. Alcohol and public health. *Lancet* 2005; **365**: 519–30.
13. Roche AM, Pidd K, Berry JG, Harrison JE. Workers' drinking patterns: the impact on absenteeism in the Australian workplace. *Addiction* 2008; **103**: 738–48.
14. Ogeil RP, Phillips JG. Commonly used stimulants: Sleep problems, dependence and psychological distress. *Drug Alcohol Depend* 2015; **153**: 145–51.
15. Liira J, Verbeek Jos H, Costa G, Driscoll Tim R, Sallinen M, Isotalo Leena K, et al. Pharmacological interventions for sleepiness and sleep disturbances caused by shift work. *Cochrane Database Syst Rev* 2014; Issue 8 DOI: 10.1002/14651858.CD009776.pub2
16. Schaufeli WB, Bakker AB, Hoogduin K, Schaap C, Kladler A. On the clinical validity of the Maslach burnout inventory and the burnout measure. *Psychol Health* 2001; **16**: 565–82.
17. Maslach C, Jackson SE, Leiter MP. Maslach burnout inventory manual. 3rd ed. Palo Alto CA: Consulting Psychologists Press; 1996.
18. Johns MW. Sensitivity and specificity of the multiple sleep latency test (MSLT), the maintenance of wakefulness test and the Epworth sleepiness scale: Failure of the MSLT as a gold standard. *J Sleep Res* 2000; **9**: 5–11.
19. Mitchell DC, Knight CA, Hockenberry J, Teplansky R, Hartman TJ. Beverage caffeine intakes in the U.S. *Food Chem Toxicol* 2014; **63**: 136–42.
20. Olfson M, King M, Schoenbaum M. Benzodiazepine use in the United States. *JAMA Psychiatry* 2015; **72**: 136–42
21. Barbone F, McMahan AD, Davey PG, Morris AD, Reid IC, McDevitt DG, et al. Association of road-traffic accidents with benzodiazepine use. *Lancet* 1998; **352**: 1331–6.

22. Daurat A, Sagaspe P, Moták L, Taillard J, Bayssac L, Huet N, et al. Lorazepam impairs highway driving performance more than heavy alcohol consumption. *Accid Anal Prev* 2013; **60**: 31–4.
23. Kay GG, Schwartz HI, Wingertzahn MA, Jayawardena S, Rosenberg RP. Next-day residual effects of gabapentin, diphenhydramine, and triazolam on simulated driving performance in healthy volunteers: a phase 3, randomized, double-blind, placebo-controlled, crossover trial. *Hum Psychopharmacol* 2016; **31**: 217–26.
24. Futenma K, Asaoka S, Takaesu Y, Komada Y, Ishikawa J, Murakoshi A, et al. Impact of hypnotics use on daytime function and factors associated with usage by female shift work nurses. *Sleep Med* 2015; **16**: 604–11.
25. Walsh JK, Randazzo AC, Stone KL, Schweitzer PK. Modafinil improves alertness, vigilance, and executive function during simulated night shifts. *Sleep* 2004; **27**: 434–9.
26. Gurtman CG, Broadbear JH, Redman JR. Effects of modafinil on simulator driving and self-assessment of driving following sleep deprivation. *Hum Psychopharmacol* 2008; **23**: 681–92.
27. Schwartz JRL, Roth T. Shift Work Sleep Disorder. *Drugs* 2012; **66**: 2357–70.
28. National Transportation Safety Board (NTSB). Safety study: fatigue, alcohol, other drugs, and medical factors in fatal-to-the-driver heavy truck crashes (volume 1). NTSB. Washington DC; 1990.
29. van Amelsvoort LGPM, Jansen NWH, Kant I. Smoking among shift workers: more than a confounding factor. *Chronobiol Int* 2006; **23**: 1105–13.
30. Schernhammer ES, Feskanich D, Liang G, Han J. Rotating night-shift work and lung cancer risk among female nurses in the United States. *Am J Epidemiol* 2013; **178**: 1434–41.



1  
2  
3 **Figure Captions:**  
4  
5  
6

7 **Figure 1.** Proportion of police officers reporting stress (A), burnout (B), fatigue-related errors (C) or non-  
8 fatigue errors (D) by use of drug. \* $p < .05$ , \*\* $p < .01$   
9

10  
11  
12 **Figure 2.** Proportion of police officers reporting excessive daytime sleepiness (A), near-misses (B), dozing  
13 during a drive following a night-shift (C) or day-shift (D) by use of drug. \* $p < .05$ , \*\* $p < .01$ .  
14  
15  
16  
17  
18  
19  
20  
21  
22  
23  
24  
25  
26  
27  
28  
29  
30  
31  
32  
33  
34  
35  
36  
37  
38  
39  
40  
41  
42  
43  
44  
45  
46  
47  
48  
49  
50  
51  
52  
53  
54  
55  
56  
57  
58  
59  
60

For peer review only



**Table 1. Use of sleep- and wake-promoting drugs (bold) and social drugs (italic) by police officers**

| <b>Drug / Class</b>                                          | <b>Categorisation for analysis (n, %)</b>                                                                                                                                                                            |
|--------------------------------------------------------------|----------------------------------------------------------------------------------------------------------------------------------------------------------------------------------------------------------------------|
| <b>Wake-promoting drugs</b><br>(excl. caffeine and nicotine) | <i>Used in the past month</i><br>Yes (180, 5.4%)<br>No (3160, 94.6%)                                                                                                                                                 |
| <b>Sleep-promoting drugs</b>                                 | <i>Used in the past month</i><br>Yes (738, 21.6%)<br>No (2674, 78.4%)                                                                                                                                                |
| <b>Drugs with sleepiness as a side-effect</b>                | <i>Used in the past month</i><br>Yes (648, 19.5%)<br>No (2678, 80.5%)                                                                                                                                                |
| <i>Alcohol</i>                                               | <i>Risky alcohol use<sup>1</sup></i><br>Yes (180, 6.3%)<br>No (2709, 93.7%)                                                                                                                                          |
| <i>Caffeine</i>                                              | <i>Average consumption per day<sup>2</sup></i><br>None (366, 10.7%)<br>Low (2250, 66.0%)<br>High (793, 23.3%)                                                                                                        |
| <i>Nicotine (Cigarettes)</i>                                 | <i>Smoking Status</i><br>Smoked to stay awake (149, 4.2% of responses and 27.2% of smokers)<br>Smoked, but not to stay awake (398, 11.1% of responses and 72.8% of smokers)<br>Non-smoker (3028, 84.7% of responses) |

<sup>1</sup> USA limit for consumption: 196g/ week males (14 std drinks) & 98g/ week females (7 std drinks).  
A std drink contains 14g of alcohol

<sup>2</sup> High > 400mg of caffeine per day (5+ servings/day); Low ≤400mg per day (up to 4 servings).<sup>19</sup>

**Table 2. Logistic regression models predicting study outcomes on sleepiness, near crashes, fatigue-related errors, stress and burnout**

| Dependent Variable   | Model Chi-square (7df), sig value | Variance explained <sup>a</sup> | Significant predictors <sup>b</sup>         | OR (95% CI)       |
|----------------------|-----------------------------------|---------------------------------|---------------------------------------------|-------------------|
| ESS score >10        | 49.953, p<.001                    | .019-.026                       | Medication with sleepiness as a side effect | 1.58 (1.19, 2.10) |
|                      |                                   |                                 | Night shift work                            | 1.48 (1.22, 1.80) |
|                      |                                   |                                 | Wake promoting meds x night shift work      | 2.56 (1.19, 5.54) |
| Near crash           | 73.987, p<.001                    | .026-.038                       | Sleep promoting medication                  | 1.61 (1.21, 2.13) |
|                      |                                   |                                 | Medication with sleepiness as a side effect | 1.38 (1.04, 1.82) |
|                      |                                   |                                 | Night-shift work                            | 1.48 (1.20, 1.81) |
| Fatigue errors       | 197.398, p<.001                   | .065-.091                       | Wake promoting medication                   | 1.68 (1.01, 2.79) |
|                      |                                   |                                 | Sleep promoting medication                  | 1.75 (1.32, 2.30) |
|                      |                                   |                                 | Medication with sleepiness as a side effect | 1.57 (1.19, 2.07) |
|                      |                                   |                                 | Night shift work                            | 2.40 (1.97, 2.92) |
| Stress <sup>c</sup>  | 58.297, p<.001                    | .025-.034                       | Wake promoting medication                   | 1.74 (1.06, 2.89) |
|                      |                                   |                                 | Sleep promoting medication                  | 1.41 (1.10, 1.82) |
|                      |                                   |                                 | Medication with sleepiness as a side effect | 1.39 (1.08, 1.78) |
|                      |                                   |                                 | Age                                         | .985(.976-.994)   |
| Burnout <sup>d</sup> | 106.26, P<.001                    | .043-.058                       | Sleep promoting medication                  | 1.83 (1.40, 2.38) |
|                      |                                   |                                 | Medication with sleepiness as a side effect | 1.82 (1.40, 2.37) |
|                      |                                   |                                 | Age                                         | .989 (.98-.99)    |
|                      |                                   |                                 | Gender                                      | .78 (.64-.96)     |

<sup>a</sup>: Estimates here represent Cox & Snell R-Square and Nagelkerke R-square values

<sup>b</sup>: Predictors and levels entered into the model: wake medications: used in the past month vs not used, sleep medications: used in the past month vs not used, medication with sleepiness as a side effect: used in the past month vs not used, night-shifts: worked vs not. Only variables significantly contributing to the model are included in the table. Model controlled for age and gender.

<sup>c</sup>: Scores of 5-7 on a 7-point Likert-type scale

<sup>d</sup>: created using Maslach's burnout scale (emotional subscale) – scores of 18+ used to reflect moderate-high burnout

**Table 3. Logistic regression models predicting risky use of social drugs**

| Dependent Variable                           | Model Chi-square (7df), sig value | Variance explained <sup>a</sup> | Significant predictors <sup>b</sup>                             | OR (95% CI)                                                                     |
|----------------------------------------------|-----------------------------------|---------------------------------|-----------------------------------------------------------------|---------------------------------------------------------------------------------|
| High caffeine                                | 41.81, p<.001                     | .017-.026                       | Sleep-promoting medication<br>Night shift work<br>Gender<br>Age | 1.49 (1.12, 1.98)<br>1.42 (1.16, 1.74)<br>1.29 (1.02, 1.63)<br>1.02 (1.01-1.03) |
| Alcohol misuse <sup>c</sup>                  | Overall model not significant     |                                 |                                                                 |                                                                                 |
| Smokers who smoke to stay awake <sup>d</sup> | 23.759, p=.001                    | .008-.028                       | Sleep promoting medication<br>Night shift work                  | 1.97 (1.06, 3.64)<br>2.12 (1.34, 3.36)                                          |

<sup>a</sup>: Estimates here represent Cox & Snell R-Square and Nagelkerke R-square values

<sup>b</sup>: Predictors and levels entered into the model: wake medications: used in the past month vs not used, sleep medications: used in the past month vs not used, medication with sleepiness as a side effect: used in the past month vs not used, night-shifts: worked vs not. Only variables significantly contributing to the model are included in the table. Model controlled for age and gender

<sup>c</sup>: users who exceeded NIH/NIAAA limits for past week use

<sup>d</sup>: smokers who reported engaging in this behaviour in order to remain alert

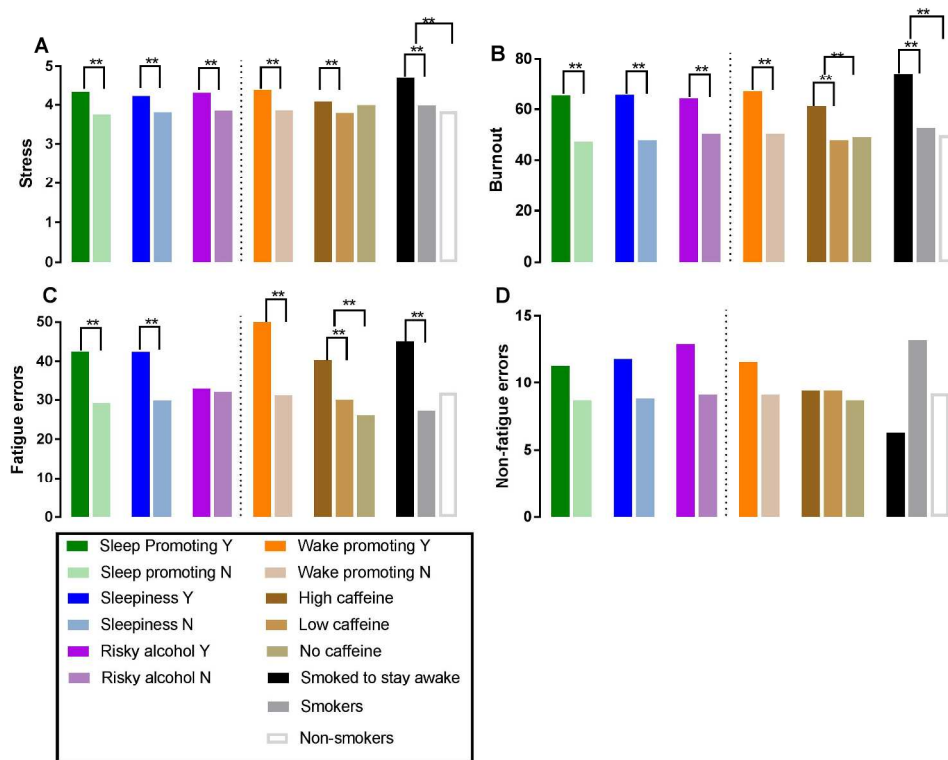

Figure 1. Proportion of police officers reporting stress (A), burnout (B), fatigue-related errors (C) or non-fatigue errors (D) by use of drug. \*p<.05, \*\*p<.01

262x212mm (300 x 300 DPI)

Only

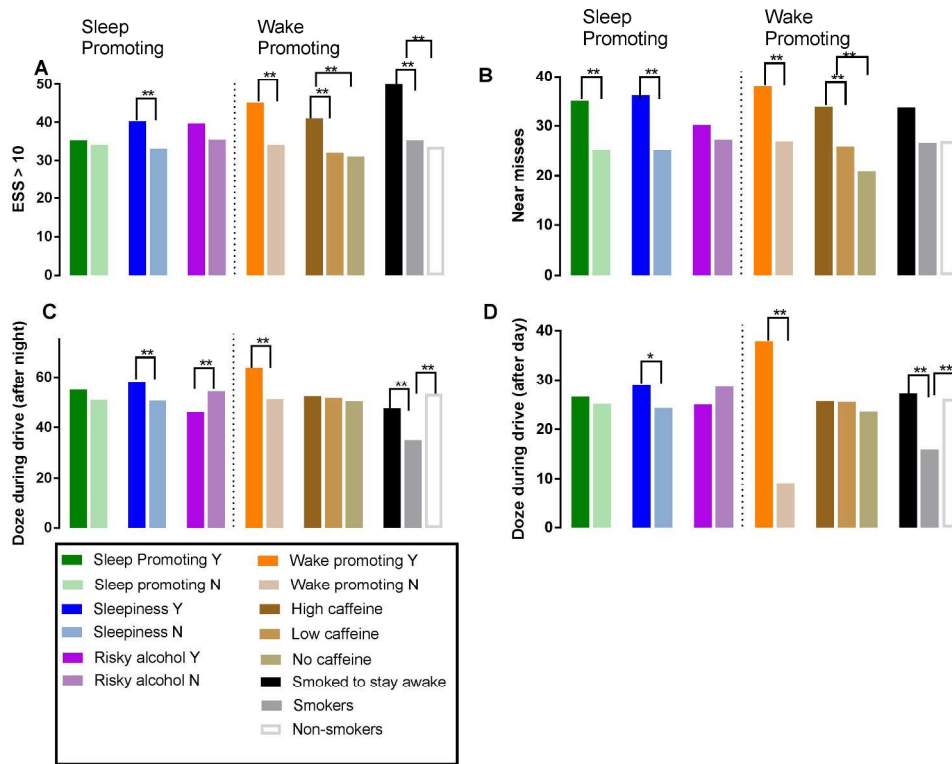

Figure 2. Proportion of police officers reporting excessive daytime sleepiness (A), near-misses (B), dozing during a drive following a night-shift (C) or day-shift (D) by use of drug. \*p<.05, \*\*p<.01.

269x218mm (300 x 300 DPI)

Only

**Supplementary Table 1. Logistic regression models predicting study outcomes controlling for OSA, insomnia and SWD diagnosis**

| Dependent Variable   | Model Chi-square (12df), sig value | Variance explained <sup>a</sup> | Significant predictors <sup>b</sup>         | OR (95% CI)       |
|----------------------|------------------------------------|---------------------------------|---------------------------------------------|-------------------|
| ESS score >10        | 137.91, p<.001                     | .050-.069                       | Medication with sleepiness as a side effect | 1.50 (1.12, 2.00) |
|                      |                                    |                                 | Night shift work                            | 1.32 (1.09, 1.62) |
|                      |                                    |                                 | Wake-promoting meds x night shift work      | 2.48 (1.19, 5.54) |
|                      |                                    |                                 | Insomnia diagnosis                          | 1.67 (1.17, 2.40) |
|                      |                                    |                                 | OSA diagnosis                               | 1.87 (1.57, 2.21) |
|                      |                                    |                                 | SWD diagnosis                               | 2.42 (1.70, 3.45) |
|                      |                                    |                                 | Near crash                                  | 111.47, p<.001    |
| Night shift work     | 1.38 (1.12, 1.70)                  |                                 |                                             |                   |
| Age                  | .99 (.98, 1.00)                    |                                 |                                             |                   |
| Insomnia diagnosis   | 1.57 (1.11, 2.22)                  |                                 |                                             |                   |
| OSA diagnosis        | 1.45 (1.22, 1.73)                  |                                 |                                             |                   |
| SWD diagnosis        | 1.61 (1.15, 2.25)                  |                                 |                                             |                   |
| Fatigue errors       | 254.87, p<.001                     | .081-.113                       | Sleep-promoting medication                  | 1.64 (1.24, 2.18) |
|                      |                                    |                                 | Medication with sleepiness as a side effect | 1.48 (1.12, 1.96) |
|                      |                                    |                                 | Night shift work                            | 2.18 (1.78, 2.67) |
|                      |                                    |                                 | Insomnia diagnosis                          | 1.68 (1.18, 2.38) |
|                      |                                    |                                 | OSA diagnosis                               | 1.54 (1.30, 1.83) |
|                      |                                    |                                 | SWD diagnosis                               | 2.06 (1.47, 2.89) |
| Stress <sup>c</sup>  | 115.94, p<.001                     | .037-.051                       | Wake-promoting medication                   | 1.70 (1.03, 2.81) |
|                      |                                    |                                 | Sleep-promoting medication                  | 1.33 (1.03, 1.72) |
|                      |                                    |                                 | Medication with sleepiness as a side effect | 1.31 (1.02, 1.69) |
|                      |                                    |                                 | Night shift work                            | .78 (.64, .95)    |
|                      |                                    |                                 | Age                                         | .982(.973-.992)   |
|                      |                                    |                                 | Gender                                      | .791 (.65, .97)   |
|                      |                                    |                                 | Insomnia diagnosis                          | 1.95 (1.38, 2.76) |
|                      |                                    |                                 | OSA diagnosis                               | 1.46 (1.24, 1.72) |
|                      |                                    |                                 | SWD diagnosis                               | 1.47 (1.05, 2.06) |
| Burnout <sup>d</sup> | 262.33, p<.001                     | .087-.12                        | Sleep-promoting medication                  | 1.68 (1.28, 2.21) |
|                      |                                    |                                 | Medication with sleepiness as a side effect | 1.67 (1.27, 2.19) |
|                      |                                    |                                 | Age                                         | .983 (.97-.99)    |
|                      |                                    |                                 | Gender                                      | .65 (.53-.80)     |
|                      |                                    |                                 | Insomnia diagnosis                          | 2.70 (1.78, 4.08) |
|                      |                                    |                                 | OSA diagnosis                               | 2.21 (1.86, 2.62) |
|                      |                                    |                                 | SWD diagnosis                               | 2.33 (1.61, 3.36) |

<sup>a</sup>: Estimates here represent Cox & Snell R-Square and Nagelkerke R-square values

<sup>b</sup>: Predictors and levels entered into the model: wake medications: used in the past month vs not used, sleep medications: used in the past month vs not used, medication with sleepiness as a side effect: used in the past month vs not used, night-shifts: worked vs not. Only variables significantly contributing to the model are included in the table. Model controlled for age, gender, and previous diagnosed OSA, insomnia or SWD.

<sup>c</sup>: Scores of 5-7 on a 7-point Likert-type scale

<sup>d</sup>: created using Maslach's burnout scale (emotional subscale) – scores of 18+ used to reflect moderate-high burnout

- 1
- 2
- 3
- 4
- 5
- 6
- 7
- 8
- 9
- 10
- 11
- 12
- 13
- 14
- 15
- 16
- 17
- 18
- 19
- 20
- 21
- 22
- 23
- 24
- 25
- 26
- 27
- 28
- 29
- 30
- 31
- 32
- 33
- 34
- 35
- 36
- 37
- 38
- 39
- 40
- 41
- 42
- 43
- 44
- 45
- 46
- 47
- 48
- 49
- 50
- 51
- 52
- 53
- 54
- 55
- 56
- 57
- 58
- 59
- 60

For peer review only

STROBE Statement – items identified by page number in bold.

|                              | <b>Item No</b> | <b>Recommendation</b>                                                                                                                                                                                                                                                                                                                                                                                                                                                      |
|------------------------------|----------------|----------------------------------------------------------------------------------------------------------------------------------------------------------------------------------------------------------------------------------------------------------------------------------------------------------------------------------------------------------------------------------------------------------------------------------------------------------------------------|
| <b>Title and abstract</b>    | 1              | (a) Indicate the study's design with a commonly used term in the title or the abstract<br><b>(Pages 1 and 2)</b><br>(b) Provide in the abstract an informative and balanced summary of what was done and what was found<br><b>(Page 2)</b>                                                                                                                                                                                                                                 |
| <b>Introduction</b>          |                |                                                                                                                                                                                                                                                                                                                                                                                                                                                                            |
| Background/rationale         | 2              | Explain the scientific background and rationale for the investigation being reported<br><b>(page 3)</b>                                                                                                                                                                                                                                                                                                                                                                    |
| Objectives                   | 3              | State specific objectives, including any prespecified hypotheses<br><b>(page 4)</b>                                                                                                                                                                                                                                                                                                                                                                                        |
| <b>Methods</b>               |                |                                                                                                                                                                                                                                                                                                                                                                                                                                                                            |
| Study design                 | 4              | Present key elements of study design early in the paper<br><b>(page 4)</b>                                                                                                                                                                                                                                                                                                                                                                                                 |
| Setting                      | 5              | Describe the setting, locations, and relevant dates, including periods of recruitment, exposure, follow-up, and data collection<br><b>(page 4)</b>                                                                                                                                                                                                                                                                                                                         |
| Participants                 | 6              | <i>Cross-sectional study</i> —Give the eligibility criteria, and the sources and methods of selection of participants <b>(page 4 + reference)</b>                                                                                                                                                                                                                                                                                                                          |
| Variables                    | 7              | Clearly define all outcomes, exposures, predictors, potential confounders, and effect modifiers. Give diagnostic criteria, if applicable<br><b>(pages 4 +5)</b>                                                                                                                                                                                                                                                                                                            |
| Data sources/<br>measurement | 8*             | For each variable of interest, give sources of data and details of methods of assessment (measurement). Describe comparability of assessment methods if there is more than one group<br><b>(page 4)</b>                                                                                                                                                                                                                                                                    |
| Bias                         | 9              | Describe any efforts to address potential sources of bias<br><b>(page 5, data analysis)</b>                                                                                                                                                                                                                                                                                                                                                                                |
| Study size                   | 10             | Explain how the study size was arrived at<br><b>(page 4)</b>                                                                                                                                                                                                                                                                                                                                                                                                               |
| Quantitative variables       | 11             | Explain how quantitative variables were handled in the analyses. If applicable, describe which groupings were chosen and why<br><b>(page 5)</b>                                                                                                                                                                                                                                                                                                                            |
| Statistical methods          | 12             | (a) Describe all statistical methods, including those used to control for confounding<br><b>(page 5)</b><br>(b) Describe any methods used to examine subgroups and interactions<br><b>(page 5)</b><br>(c) Explain how missing data were addressed<br><b>(page 5)</b><br><i>Cross-sectional study</i> —If applicable, describe analytical methods taking account of sampling strategy- <b>(page 4 + reference)</b><br>(e) Describe any sensitivity analyses <b>(page 5)</b> |



1  
2  
3  
4  
5  
6  
7  
8  
9  
10  
11  
12  
13  
14  
15  
16  
17  
18  
19  
20  
21  
22  
23  
24  
25  
26  
27  
28  
29  
30  
31  
32  
33  
34  
35  
36  
37  
38  
39  
40  
41  
42  
43  
44  
45  
46  
47  
48  
49  
50  
51  
52  
53  
54  
55  
56  
57  
58  
59  
60

Continued on next page

For peer review only

**Results**

|                  |     |                                                                                                                                                                                                                                                                                                                                                                                                                                                                        |
|------------------|-----|------------------------------------------------------------------------------------------------------------------------------------------------------------------------------------------------------------------------------------------------------------------------------------------------------------------------------------------------------------------------------------------------------------------------------------------------------------------------|
| Participants     | 13* | (a) Report numbers of individuals at each stage of study—eg numbers potentially eligible, examined for eligibility, confirmed eligible, included in the study, completing follow-up, and analysed ( <b>page 4 + reference</b> )<br>(b) Give reasons for non-participation at each stage ( <b>page 4 + reference</b> )<br>(c) Consider use of a flow diagram <b>n/a</b>                                                                                                 |
| Descriptive data | 14* | (a) Give characteristics of study participants (eg demographic, clinical, social) and information on exposures and potential confounders – <b>page 5</b><br>(b) Indicate number of participants with missing data for each variable of interest- <b>tables</b><br>(c) <i>Cohort study</i> —Summarise follow-up time (eg, average and total amount) <b>n/a</b>                                                                                                          |
| Outcome data     | 15* | <i>Cross-sectional study</i> —Report numbers of outcome events or summary measures ( <b>page 5+6</b> )                                                                                                                                                                                                                                                                                                                                                                 |
| Main results     | 16  | (a) Give unadjusted estimates and, if applicable, confounder-adjusted estimates and their precision (eg, 95% confidence interval). Make clear which confounders were adjusted for and why they were included – <b>pages 5,6 and tables</b><br>(b) Report category boundaries when continuous variables were categorized- <b>tables</b><br>(c) If relevant, consider translating estimates of relative risk into absolute risk for a meaningful time period- <b>n/a</b> |
| Other analyses   | 17  | Report other analyses done—eg analyses of subgroups and interactions, and sensitivity analyses- <b>page 6 and tables</b>                                                                                                                                                                                                                                                                                                                                               |

**Discussion**

|                  |    |                                                                                                                                                                                                |
|------------------|----|------------------------------------------------------------------------------------------------------------------------------------------------------------------------------------------------|
| Key results      | 18 | Summarise key results with reference to study objectives ( <b>page 6+7</b> )                                                                                                                   |
| Limitations      | 19 | Discuss limitations of the study, taking into account sources of potential bias or imprecision. Discuss both direction and magnitude of any potential bias ( <b>page 9</b> )                   |
| Interpretation   | 20 | Give a cautious overall interpretation of results considering objectives, limitations, multiplicity of analyses, results from similar studies, and other relevant evidence ( <b>page 8+9</b> ) |
| Generalisability | 21 | Discuss the generalisability (external validity) of the study results ( <b>page 8+9</b> )                                                                                                      |

**Other information**

|         |    |                                                                                                                                                                                  |
|---------|----|----------------------------------------------------------------------------------------------------------------------------------------------------------------------------------|
| Funding | 22 | Give the source of funding and the role of the funders for the present study and, if applicable, for the original study on which the present article is based ( <b>page 10</b> ) |
|---------|----|----------------------------------------------------------------------------------------------------------------------------------------------------------------------------------|

\*Give information separately for cases and controls in case-control studies and, if applicable, for exposed and unexposed groups in cohort and cross-sectional studies.

**Note:** An Explanation and Elaboration article discusses each checklist item and gives methodological background and published examples of transparent reporting. The STROBE checklist is best used in conjunction with this article (freely available on the Web sites of PLoS Medicine at <http://www.plosmedicine.org/>, Annals of Internal Medicine at <http://www.annals.org/>, and Epidemiology at <http://www.epidem.com/>). Information on the STROBE Initiative is available at [www.strobe-statement.org](http://www.strobe-statement.org).

# BMJ Open

## A cross-sectional analysis of sleep- and wake-promoting drug use on health, fatigue-related error and near crashes in police officers

|                                 |                                                                                                                                                                                                                                                                                                                                                                                                                                                                                                                                                                                                                                                                                                                                                                                                                                                                                                                                                                                                                                                                                                                                                                                                                                                                                                                                                                                                                                                                                                                                                                                                                                                                                                                                                                                        |
|---------------------------------|----------------------------------------------------------------------------------------------------------------------------------------------------------------------------------------------------------------------------------------------------------------------------------------------------------------------------------------------------------------------------------------------------------------------------------------------------------------------------------------------------------------------------------------------------------------------------------------------------------------------------------------------------------------------------------------------------------------------------------------------------------------------------------------------------------------------------------------------------------------------------------------------------------------------------------------------------------------------------------------------------------------------------------------------------------------------------------------------------------------------------------------------------------------------------------------------------------------------------------------------------------------------------------------------------------------------------------------------------------------------------------------------------------------------------------------------------------------------------------------------------------------------------------------------------------------------------------------------------------------------------------------------------------------------------------------------------------------------------------------------------------------------------------------|
| Journal:                        | <i>BMJ Open</i>                                                                                                                                                                                                                                                                                                                                                                                                                                                                                                                                                                                                                                                                                                                                                                                                                                                                                                                                                                                                                                                                                                                                                                                                                                                                                                                                                                                                                                                                                                                                                                                                                                                                                                                                                                        |
| Manuscript ID                   | bmjopen-2018-022041.R1                                                                                                                                                                                                                                                                                                                                                                                                                                                                                                                                                                                                                                                                                                                                                                                                                                                                                                                                                                                                                                                                                                                                                                                                                                                                                                                                                                                                                                                                                                                                                                                                                                                                                                                                                                 |
| Article Type:                   | Research                                                                                                                                                                                                                                                                                                                                                                                                                                                                                                                                                                                                                                                                                                                                                                                                                                                                                                                                                                                                                                                                                                                                                                                                                                                                                                                                                                                                                                                                                                                                                                                                                                                                                                                                                                               |
| Date Submitted by the Author:   | 02-Jul-2018                                                                                                                                                                                                                                                                                                                                                                                                                                                                                                                                                                                                                                                                                                                                                                                                                                                                                                                                                                                                                                                                                                                                                                                                                                                                                                                                                                                                                                                                                                                                                                                                                                                                                                                                                                            |
| Complete List of Authors:       | <p>Ogeil, Rowan; Monash University, Eastern Health Clinical School; Harvard Medical School, Division of Sleep and Circadian Disorders, Departments of Medicine and Neurology, Brigham and Women's Hospital; Division of Sleep Medicine</p> <p>Barger, Laura; Brigham and Women's Hospital, Division of Sleep and Circadian Disorders; Harvard Medical School, Division of Sleep and Circadian Disorders, Departments of Medicine and Neurology, Brigham and Women's Hospital; Division of Sleep Medicine</p> <p>Lockley, Steven; Monash University, Monash Institute of Cognitive and Clinical Neurosciences and School of Psychological Sciences; Harvard Medical School, Division of Sleep and Circadian Disorders, Departments of Medicine and Neurology, Brigham and Women's Hospital; Division of Sleep Medicine</p> <p>O'Brien, Conor; Brigham and Women's Hospital, Division of Sleep and Circadian Disorders</p> <p>Sullivan, Jason; Brigham and Women's Hospital, Division of Sleep and Circadian Disorders</p> <p>Qadri, Salim; Brigham and Women's Hospital, Division of Sleep and Circadian Disorders</p> <p>Lubman, D; Monash University, Eastern Health Clinical School</p> <p>Czeisler, Charles; Brigham and Women's Hospital, Division of Sleep and Circadian Disorders; Harvard Medical School, Division of Sleep and Circadian Disorders, Departments of Medicine and Neurology, Brigham and Women's Hospital; Division of Sleep Medicine</p> <p>Rajaratnam, Shantha M. W.; Monash University, Monash Institute of Cognitive and Clinical Neurosciences and School of Psychological Sciences; Harvard Medical School, Division of Sleep and Circadian Disorders, Departments of Medicine and Neurology, Brigham and Women's Hospital; Division of Sleep Medicine</p> |
| <b>Primary Subject Heading</b>: | Occupational and environmental medicine                                                                                                                                                                                                                                                                                                                                                                                                                                                                                                                                                                                                                                                                                                                                                                                                                                                                                                                                                                                                                                                                                                                                                                                                                                                                                                                                                                                                                                                                                                                                                                                                                                                                                                                                                |
| Secondary Subject Heading:      | Mental health, Addiction                                                                                                                                                                                                                                                                                                                                                                                                                                                                                                                                                                                                                                                                                                                                                                                                                                                                                                                                                                                                                                                                                                                                                                                                                                                                                                                                                                                                                                                                                                                                                                                                                                                                                                                                                               |
| Keywords:                       | MENTAL HEALTH, shift work, drug use, health, performance, safety                                                                                                                                                                                                                                                                                                                                                                                                                                                                                                                                                                                                                                                                                                                                                                                                                                                                                                                                                                                                                                                                                                                                                                                                                                                                                                                                                                                                                                                                                                                                                                                                                                                                                                                       |
|                                 |                                                                                                                                                                                                                                                                                                                                                                                                                                                                                                                                                                                                                                                                                                                                                                                                                                                                                                                                                                                                                                                                                                                                                                                                                                                                                                                                                                                                                                                                                                                                                                                                                                                                                                                                                                                        |

1  
2  
3  
4  
5  
6  
7  
8  
9  
10  
11  
12  
13  
14  
15  
16  
17  
18  
19  
20  
21  
22  
23  
24  
25  
26  
27  
28  
29  
30  
31  
32  
33  
34  
35  
36  
37  
38  
39  
40  
41  
42  
43  
44  
45  
46  
47  
48  
49  
50  
51  
52  
53  
54  
55  
56  
57  
58  
59  
60

SCHOLARONE™  
Manuscripts

For peer review only

**A cross-sectional analysis of sleep- and wake-promoting drug use on health, fatigue-related error and near crashes in police officers**

Rowan P. Ogeil, Ph.D.<sup>1,2,3</sup>, Laura K. Barger, Ph.D.<sup>1,2</sup>, Steven W. Lockley, Ph.D.<sup>1,2,4</sup>, Conor S. O'Brien, B.A.<sup>1</sup>, Jason P. Sullivan, B.S.<sup>1</sup>, Salim Qadri, B.S.<sup>1</sup>, Dan I. Lubman, MB ChB, Ph.D.<sup>3</sup>, Charles A. Czeisler, Ph.D., M.D.<sup>1,2</sup>, Shantha M.W. Rajaratnam, Ph.D.<sup>1,2,4</sup>

<sup>1</sup> Division of Sleep and Circadian Disorders, Departments of Medicine and Neurology, Brigham and Women's Hospital, Boston MA, USA.

<sup>2</sup> Division of Sleep Medicine, Harvard Medical School, Boston MA, USA.

<sup>3</sup> Eastern Health Clinical School, Monash University, Box Hill VIC, Australia and Turning Point, Eastern Health, Fitzroy VIC, Australia.

<sup>4</sup> Monash Institute of Cognitive and Clinical Neurosciences, School of Psychological Sciences, Monash University, Clayton VIC, Australia.

**Address for Correspondence:**

Rowan P. Ogeil, Ph.D.

Turning Point, 54-62 Gertrude St., Fitzroy 3065 VIC, Australia

Telephone: +613 8413 8469

Fax: +613 9416 3420

Email: Rowan.Ogeil@monash.edu

**Word Count:** 3600

**Abstract**

1 **Objectives:** To examine sleep- and wake-promoting drug use in police officers, and associations  
2 between their use and health (excessive sleepiness, stress, burnout), performance, (fatigue-  
3 related errors), and safety (near-crashes) outcomes, both alone and in combination with night-  
4 shift work.  
5

6 **Design:** Cross-sectional survey.  
7

8 **Setting:** Police officers from North America completed the survey either on-line or via  
9 paper/pencil at a police station.  
10

11 **Participants:** 4957 police participated, 3693 online (91.9%, participation rate), and 1264 on-site  
12 (cooperation rate 63.1%).  
13

14 **Main outcome measures:** Sleep and wake-promoting drug use, excessive sleepiness, near-crash  
15 motor vehicle crashes, dozing while driving, fatigue errors, stress, and burnout.  
16

17 **Results:** Over the past month, 20% of police officers reported using sleep-promoting drugs and  
18 drugs causing sleepiness, while wake-promoting agents were used by 28% of police (5% used  
19 wake-promoting drugs, 23% used high levels of caffeine, and 4% smoked to stay awake). Use of  
20 sleep-promoting drugs was associated with increased near-crashes (OR=1.61; 95% confidence  
21 interval [CI]: 1.21 to 2.13), fatigue-related errors (OR=1.75; 95% CI: 1.32 to 2.79), higher stress  
22 (OR=1.41; 95% CI: 1.10 to 1.82), and higher burnout (OR=1.83; 95% CI: 1.40 to 2.38). Wake-  
23 promoting drug use, high caffeine and smoking to stay awake were associated with increased odds  
24 of a fatigue-related error, stress and burnout (ORs ranging from 1.68 to 2.56). Caffeine  
25 consumption was common, and while smoking was not, of those participants who did smoke, one-  
26 in-three did so to remain awake. Night-shift work was associated with independent increases in  
27 excessive sleepiness, near-crashes, and fatigue-related errors. Interactions between night-shift  
28 work and wake-promoting drug use were also found for excessive sleepiness.  
29

30 **Conclusions:** Police who use sleep- and wake-promoting drugs, especially when working night  
31 shifts, are most vulnerable to adverse health, performance and safety outcomes. Future research  
32 should examine temporal relationships between shift-work, drug use and adverse outcomes, in  
33 order to develop optimal alertness management strategies.  
34

35 **Keywords:** Mental health; shift work; drug use, health, performance, safety.  
36  
37  
38  
39  
40  
41  
42  
43  
44  
45  
46  
47  
48  
49  
50  
51  
52  
53  
54  
55  
56  
57  
58  
59  
60

**Strengths and limitations of this study:**

- Examines the contribution of both use of sleep- and wake-promoting drugs and shift schedules on health, performance, and safety outcomes.
- Data were obtained from a large sample of North American police officers.
- Self-assessment of outcome measures was used, which may be subject to a bias not to report.
- The retrospective nature of the survey may have been affected by recall or social desirability bias.

For peer review only

## Introduction

1 Sleep problems adversely impact the physical and mental health of individuals, and place a high  
2 economic and health care burden on the community.<sup>1</sup> Poorer health outcomes among those who  
3 work non-standard shifts include an increased prevalence of chronic sleep disorders including  
4 excessive daytime sleepiness, mental health disturbance (stress and burnout), cardiovascular  
5 disease, and diabetes.<sup>2</sup>

6  
7  
8 Shift-work disorder is characterised by insomnia and/or excessive daytime sleepiness associated  
9 with work schedules.<sup>3</sup> Between 8 and 14% of shift workers meet the clinical criteria for a diagnosis  
10 of shift-work disorder, with rates as high as 26% reported in those working rotating shifts.<sup>2</sup> The  
11 incidence of shift-work disorder is likely underestimated, however, given that the symptoms which  
12 define the disorder are common to many sleep disorders, and most shift workers will experience  
13 some adverse consequences as a result of opposing circadian physiology to sleep at night, and to  
14 be awake during the day.<sup>2</sup> As an occupational group, police provide services 24-hours a day, with  
15 officers required to work overnight shifts. Shift-work disorder in both police and other  
16 professionals is associated with adverse consequences including an increased propensity for work  
17 related errors, decrements in performance and increase incidence of motor vehicle crashes or  
18 near-crashes which collectively negatively impact both individual officers and the community.<sup>3,4</sup>

19  
20  
21  
22 The majority of shift workers do not adapt to the shifted sleep-wake schedule required for their  
23 work,<sup>5</sup> and our understanding of those workers who may be more vulnerable or resistant to shift-  
24 work disorder is limited.<sup>6</sup> Circadian misalignment between internally driven physiological  
25 processes and the light-dark cycle has been proposed as the mechanism which underlies poorer  
26 physical and mental health observed in shift workers.<sup>7</sup> Kalmbach et al.<sup>8</sup> reported that those who  
27 develop shift-work disorder report greater levels of anxiety and depression compared to shift  
28 workers who do not. These negative effects were further compounded in shift workers with  
29 circadian systems that were slower to adapt to changes associated with work-shifts, suggesting  
30 that while the biological clock has difficulty adapting to the demands imposed by shift-work, that  
31 there are likely trait and state characteristics of individuals that are associated with greater  
32 impairment or resilience to health and performance effects following night-shift work.

33  
34  
35  
36  
37 Hitherto, research examining shift schedules and effects on health and performance outcomes has  
38 generally not considered the use of sleep- and wake-promoting drugs. While 1 in 10 adults in the  
39 general population have used alcohol as a sleep aid, recent data suggest higher rates of  
40 consumption in shift workers with one in six consuming alcohol to help initiate sleep between  
41 shifts.<sup>9</sup> Indeed, following prescription sleep medications (e.g., benzodiazepines), alcohol is also  
42 commonly used as sleeping aid by shift workers.<sup>10</sup> High alcohol or continued use of prescription  
43 sleeping aids is of concern given that their long-term use is associated with poor health and public  
44 health outcomes.<sup>11,12</sup> For example, Roche et al.<sup>13</sup> reported that high-risk drinkers are 22 times  
45 more likely than low-risk drinkers to be absent from work due to alcohol use, placing a large  
46 burden on the economy due to lost productivity.

47  
48  
49  
50  
51  
52  
53  
54  
55  
56  
57  
58  
59  
60  
Common wake-promoting medications used by shift workers include freely available stimulants  
(e.g., caffeine and nicotine),<sup>14</sup> in addition to medication obtained via prescription, over-the-  
counter or as a supplement. A Cochrane review that examined pharmacological product efficacy  
for shift work disorder found mixed to limited efficacy of wake-promoting agents including  
modafinil and caffeine.<sup>15</sup> As with sleep-promoting medication, there may be negative  
consequences that accompany continued use of stimulants. For example, reliance on caffeine has  
been associated with poorer sleep quality, increased levels of daytime dysfunction, and increased



levels of night time disturbance. In contrast, nicotine dependence has been associated with poorer sleep quality and increased use of sleep medication and sleep disturbances.<sup>14</sup>

This study investigated the use of the sleep- and wake-promoting drugs and their associations with night shift work and health indices (excessive sleepiness, stress, burnout), performance (fatigue-related errors), and safety (near-crashes) outcomes. These outcomes were chosen given that they have previously been demonstrated to be negatively impacted by night shifts<sup>2,4</sup>, and increases in these outcomes is likely to play a role in unintentional injuries and increased mortality in police officers.<sup>16</sup>

## Methods

### *Participants*

Police officers in North America (United States 97%, Canada 3%) were recruited to participate in a cross-sectional study either online ( $n=3693$ ) or on-site ( $n=1264$ ). A total of 4957 officers completed the survey between July 2005 and December 2007 with a cooperation rate of 63.1% in the on-site cohort and a 91.9%, participation rate in the online sample.<sup>4</sup> Further details of the sample have been described previously<sup>4</sup>, and when completing the survey all participants reported being 18 years or older, and were sworn police officers.

The protocol was approved by the Partners and Monash Human Research Ethics Committees, with the secondary analysis of data for the present analysis approved in April 2015. Participants provided written or electronic informed consent and were not informed about study hypotheses.

### *Materials and Survey Instruments*

In the survey, participants completed sections on their demographics (age, gender, primary role within the police force, length of service, ethnicity). Participants then answered questions about their sleep-promoting drug use (alcohol, prescription sleep medication, over the counter (OTC) or herbal medication, medication that listed sleepiness as a side-effect), and wake-promoting drug use (caffeine, cigarettes, prescribed medication, OTC/herbal medication). Each of these drug use questions asked participants about their use of these types of drugs over the past month, with responses subsequently coded as “used” or “not used” in the past month.

The survey also contained questions about health, performance and safety outcomes over the past month. Stress was assessed with a Likert-type scale asking participants to rate their level of stress from 1 (not at all stressful) to 7 (very stressful) over the past month. The Maslach Burnout inventory (sensitivity 0.70, specificity 0.57)<sup>17</sup> is a 22 question, validated questionnaire. The emotional exhaustion subscale contains 9-items and was used to assess burnout that develops in response to chronic occupational stress.<sup>18</sup> Excessive sleepiness was assessed using the Epworth Sleepiness Scale (ESS) (sensitivity 0.94, specificity 1.00).<sup>19</sup> Performance was assessed with the questions, “In the last month, do you believe sleep deprivation or fatigue caused you to make a mistake or be unnecessarily unsafe in some way?” and “In the last month, do you believe you made a mistake or were unnecessarily unsafe in some way for reasons other than sleep deprivation or fatigue?” To assess motor vehicle safety following a shift the following questions were used: “In the last month, did you have any near miss motor vehicle accidents or crashes (narrowly avoided property damage or bodily harm) in which you were driving?”, “How likely are you to doze off...: While driving, after you worked a night shift?” and “How likely are you to doze off...: While driving, after you worked a day or evening shift?” Night shifts were defined as having





The present study identified night-shifts as an independent risk factor for excessive daytime sleepiness, near-crashes and fatigue-related errors, supporting previous studies.<sup>2,3</sup> Similarly, a significant proportion of shift workers reported high levels of stress and burnout.<sup>2,6,8</sup> Importantly, the present study extends this work by showing that use of sleep- and-wake promoting drugs was independently associated with poorer health (e.g., stress, burnout) and performance (e.g., fatigue attributable errors, near-crashes) outcomes. Use of sleep- and wake-promoting drugs was also associated with increased excessive sleepiness in night shift workers. Relationships between drug use and poor outcomes remained significant even after controlling for common sleep disorders.

One-in-five police officers reported using a sleep-promoting drug, or drug that listed sleepiness as a side-effect. While we did not ask police officers about their use of specific classes of sleep-promoting medication, the use of benzodiazepines is common in the United States, with a retrospective study reporting that one-in-twenty adults had been prescribed a drug from this class during 2008<sup>21</sup>, suggesting higher rates of use of sleep-promoting drugs in this group. While short-term use of medications including benzodiazepines is recommended to ameliorate insomnia, benzodiazepine use has been associated with impairment of driving performance,<sup>22</sup> with a single dose of lorazepam causing greater lane deviations compared with alcohol intoxication of .05% BAC.<sup>23</sup> In addition, triazolam causes residual next day decrements in driving performance,<sup>24</sup> and benzodiazepines with a long half-life, commonly prescribed as anxiolytics have also been associated with increased risk of a motor crash.<sup>22</sup> This is important given the increased rates of stress and burnout reported by police who used sleep-promoting medication in the present study, and previously reported decreases in quality of life and depression symptoms in nurses reported to have used hypnotic drugs.<sup>25</sup> Police using sleep-promoting medication were also more likely to report an error at work attributable to fatigue. Procedural errors and injuries at work associated with use of hypnotic drugs have also been reported in nurses<sup>25</sup>. Such effects may result from a desire to overcome sleepiness or anxiety (given the ESS and high stress reported by police in this sample), or reflect rebound or next day-effects.

Caffeine is widely consumed across the population, with 89% of adults in the US consuming caffeinated beverages<sup>26</sup>, similar to the distribution of use reported in our study. However, while mean average consumption is estimated at 186mg across the population<sup>26</sup>, we found that more than 20% of police used a high level of caffeine (>400mg/day), and more than 5% used a medication or over-the-counter drug to promote wakefulness (excluding caffeine) in the past month. Lifetime prevalence of wake-promoting drugs differs across the population, but student samples have estimated a lifetime prevalence of 2-8% depending on drug class, broadly similar to use in the present study<sup>27</sup>. Of those who smoked, a third reported doing so to remain awake. Wake-promoting agents may be used by shift-workers in order to maintain vigilance and alertness on-shift; however, evidence on their efficacy is mixed.<sup>15</sup> Previous studies have suggested that modafinil may have cognitive enhancing effects following sleep deprivation, including in those engaged in simulated night-shift work.<sup>28</sup> Other reports have suggested increases in some measures of simulated driving performance, specifically lane deviation but not speed deviation or off-road incidents, following modafinil suggesting caution with its use as a countermeasure for sleepiness.<sup>29</sup> Our logistic regression analysis did not find wake-promoting drug use a significant predictor of near-crashes. This may reflect that these drugs are being used to alleviate tiredness prior to driving a vehicle, or alternatively, if there is a negative impact on driving performance as found in the studies above, that a much smaller proportion of police officers were using wake-promoting (~5.4%) compared with sleep-promoting drugs (~20%). Our study did find that use of wake-promoting drugs was associated with reported decrements in performance, and also

1 increased levels of stress/burnout that may be related to changes in shift schedule, particularly  
2 given the interaction between use of wake-promoting medication and night-shift work that  
3 significantly increases the odds of excessive levels of daytime sleepiness. Given this pattern of  
4 findings, future research should investigate both the time of day and intention for use of wake-  
5 promoting drugs to determine whether they are being used to aid work-related tasks specifically  
6 at work and/or driving, and whether there are pharmacokinetic consequences to this timing which  
7 may impact subsequent behaviours.

8 Widespread use of licit stimulants was common amongst police in our sample, and moderate  
9 caffeine consumption (e.g., up to 250mg) has been proposed as a countermeasure to increase  
10 performance during night-shift work by the National Sleep Foundation.<sup>30</sup> Dependence on caffeine  
11 has been associated with negative consequences, however, including poorer sleep quality and  
12 increased daytime dysfunction.<sup>14</sup> In our study, high caffeine users (>400mg)<sup>20</sup> were more likely to  
13 report a fatigue-related error or near-miss crash in the present study. These findings are  
14 consistent with a previous report that caffeine is the most prevalent stimulant in fatal-to-the-  
15 driver heavy truck crashes.<sup>31</sup> While use of caffeine in moderate levels may protect against  
16 sleepiness-related errors at work, exceeding these levels is associated with detrimental health and  
17 performance impacts. Our results suggest that high caffeine use may be an important marker of  
18 vulnerability to excessive sleepiness and performance impairment.

19 Although the majority of police in our sample were non-smokers, of those who smoked, almost  
20 one-in-three reported smoking in order to stay awake. Smoking rates are reportedly higher in  
21 night-shift workers, with rates of uptake that are significantly greater in shift workers compared to  
22 traditional day workers.<sup>32</sup> Indeed, lung cancer rates of rotating shift workers are significantly  
23 greater in current smokers.<sup>33</sup> In addition, dependence upon nicotine has been associated with  
24 numerous adverse health effects, including poorer sleep.<sup>14</sup> Police in our sample who reported  
25 smoking in order to remain awake reported greater levels of daytime sleepiness, increased  
26 propensity to make fatigue-related errors and higher levels of stress and burnout, even compared  
27 with smokers who did not engage in this behaviour. As was the case with those officers reporting  
28 high caffeine consumption, it may be that these users are vulnerable to the effects of shift work,  
29 and are using high levels of these stimulants as a countermeasure against this vulnerability. This  
30 may at least in part explain the previous finding that smoking rates are higher in night-shift  
31 workers compared to day workers<sup>32</sup>.

32 Recent work has called for further research to understand the inter-individual variability in sleep-  
33 wake responses to shift work in order to identify those vulnerable or resilient to assist them in  
34 managing shifts.<sup>6</sup> The present study suggests that excessive use of sleep- or wake-promoting  
35 medication may be one such trait, given higher rates of use in those formally diagnosed with shift-  
36 work disorder. Our models found that both night-shift work and use of sleep-promoting  
37 medication were associated with increased odds of both high caffeine use and smoking to stay  
38 awake, with high use of each of these drugs associated with adverse health and safety outcomes.  
39 In addition to organisational efforts to promote shift-work schedules associated with better health  
40 and safety outcomes,<sup>2</sup> individual differences in the vulnerability to sleepiness caused by shift work  
41 should also be considered, recognising that excessive use of pharmacological countermeasures  
42 should not be considered the first-line management approach in such cases. A possible approach  
43 to assess the extent of sleepiness in shift work, and the role that stimulants including licit and  
44 available ones play in enabling shift-work or extended duration work shifts, is to raise the  
45 hypothetical question: What would happen to workplace sleepiness, safety, and productivity if  
46 caffeine use was not permitted?



### *Limitations and Future Research*

1 The present study used self-assessment of the primary health and performance outcomes, and  
2 may be subject to a bias not to report, given the consequences of errors associated with police  
3 work and the non-complete cooperation and response rates. Previous studies using both cross-  
4 sectional and prospective designs have reported similar levels of outcomes as reported here,  
5 however, including in occupational groups such as police where errors can have large negative  
6 impacts.<sup>4</sup> The retrospective nature of the drug use questionnaires may have been affected by  
7 recall bias, or a social desirability bias given the lower response rates to some of the drug use  
8 questions. In addition, we did not ask participants to nominate whether specific drug classes under  
9 the rubric of sleep-promoting or wake-promoting had been used, and future studies may utilise  
10 other methods to gauge drug use and/or behavioural outcomes using timeline follow back  
11 methods<sup>34</sup> over longer periods to further examine the relationship between drug use, health,  
12 productivity and safety variables. Despite this, we still found significant associations between the  
13 use of sleep- and wake-promoting drugs and health and performance outcomes. Future studies  
14 should incorporate amount and frequency estimates of drug and medication use, as well as  
15 eliciting more information about the time at which these drugs are used, and specific drug classes  
16 used to better understand these associations. Collection of these additional data may also allow  
17 for further examination of the small sub-group of officers who reported use of both a sleep-  
18 promoting and a wake-promoting drug in the past month.

### *Conclusion*

24 The present study found that over and above the effects of working night-shifts, use of sleep- and  
25 wake-promoting drugs was associated with detrimental health (stress, burnout, excessive daytime  
26 sleepiness), performance (errors) and safety (near-crashes) outcomes. In the past month, one-in-  
27 five police officers reported using a sleep-promoting drug, or drug that listed sleepiness as a side-  
28 effect, and almost one-in-three used a wake promoting drug, high caffeine levels, or smoking  
29 cigarettes to stay awake. Examining patterns of drug use among shift-workers may provide useful  
30 markers of vulnerability to shift work to form the basis for personalised intervention strategies.

**Footnotes:**

1 **Contributors:** RO, LB, SL, CO, JS, CC and SR conceived the research question and study design. LB,  
2 SL, CC and SR obtained funding for data collection. LB, SL, CO, JS, SQ, CC and SR acquired the data.  
3 RO, LB, SL, JS, DL, CC and SR analysed and/or interpreted data from the study. RO drafted the  
4 initial manuscript, with critical revision and important intellectual content provided by RO, LB, SL,  
5 CO, JS, SQ, DL, CC and SR. Administrative, technical or material support was provided by CO, JS,  
6 and SQ. Study supervision was provided by LB, CO, JS, CC and SR.  
7

9 **Funding:** This study was supported by grant 2004-FS-BX-0001 and grant 2010C-10002 from the  
10 National Institute of Justice, Office of Justice Programs, US Department of Justice; grants R01  
11 OH008496 and R01 OH009403 from the Centers for Disease Control and Prevention. RO was  
12 supported by a Harvard Club of Australia Fellowship, and is the recipient on an NHMRC Peter  
13 Doherty award. LB was supported in part by grant R01 OH 010300 from the National Institute of  
14 Occupational Safety and Health.  
15

17 **Competing interests:** LB has consulted for Sygma, NASA Ames Research Center, Insight and  
18 CurAegis. She is on the scientific advisory board of CurAegis.  
19

20 SL declares no conflicts with the work described herein. In the past 3 years, he has received  
21 consulting fees from the Atlanta Falcons, Atlanta Hawks, Consumer Sleep Solutions, OpTerra  
22 Energy Services Inc., Pegasus Capital Advisors LP, Serrado Capital, Slingshot Insights, and Team C  
23 Racing, and has current consulting contracts with Akili Interactive, Apex 2100 Ltd, Delos Living LLC,  
24 Headwaters Inc., Hints Performance AG, Light Cognitive, Lighting Science Group Corporation,  
25 Mental Workout, PlanLED, , Six Senses and Wyle Integrated Science and Engineering. SL has  
26 received unrestricted equipment gifts from Biological Illuminations LLC, Bionetics Corporation, and  
27 F.Lux Software LLC; has equity in iSLEEP, Pty; advance author payment and/or royalties from  
28 Oxford University Press; honoraria plus travel, accommodation and/or meals for invited seminars,  
29 conference presentations or teaching from BHP Billiton, Lightfair, Informa Exhibitions (USGBC),  
30 Teague; travel, accommodation and/or meals only (no honoraria) for invited seminars, conference  
31 presentations or teaching from DIN, FASEB, Lightfair, SLTBR, and USGBC. SL has completed an  
32 investigator-initiated research grant from Biological Illumination LLC and has an ongoing  
33 investigator initiated grant from F. Lux Software LLC. SL holds a process patent for "Systems and  
34 methods for determining and/or controlling sleep quality," which is assigned to the Brigham and  
35 Women's Hospital per Hospital policy. SL has also served as a paid expert for legal proceedings  
36 related to light, sleep, and health. SL is a Program Leader for the CRC for Alertness, Safety and  
37 Productivity, Australia.  
38

39 DIL has received speaking honoraria from AstraZeneca, Janssen, Servier and Lundbeck, and has  
40 provided consultancy advice to Lundbeck and Indivior.  
41

42 CC has received consulting fees from or served as a paid member of scientific advisory boards for:  
43 Ganésco Inc.; Institute of Digital Media and Child Development; Klarman Family Foundation;  
44 Vanda Pharmaceuticals and Washington State Board of Pilotage Commissioners. CC has also  
45 received education/research support from Optum, Philips Respironics, Inc., San Francisco Bar  
46 Pilots, Schneider Inc., Sysco, and Vanda Pharmaceuticals. The Sleep and Health Education Program  
47 of the Harvard Medical School Division of Sleep Medicine, and the Sleep Matters Initiative (which  
48 CC directs) have received funding for educational activities from Cephalon, Inc., Jazz  
49 Pharmaceuticals, ResMed, Takeda Pharmaceuticals, Teva Pharmaceuticals Industries Ltd., Sanofi-  
50 Aventis, Inc., Sepracor, Inc., Wake Up Narcolepsy, and Mary Ann & Stanley Snider via Combined  
51

1 Jewish Philanthropies. CC is the incumbent of an endowed professorship provided to Harvard  
2 University by Cephalon, Inc. and holds a number of process patents in the field of sleep/circadian  
3 rhythms (e.g., photic resetting of the human circadian pacemaker). Since 1985, CC has also served  
4 as an expert on various legal and technical cases related to sleep and/or circadian rhythms  
5 including those involving the following commercial entities: Complete General Construction  
6 Company, FedEx, Greyhound, HG Energy LLC, South Carolina Central Railroad Co., Steel  
7 Warehouse Inc., Stric-Lan Companies LLC, Texas Premier Resource LLC and United Parcel Service  
8 (UPS). CC owns or owned an equity interest in Vanda Pharmaceuticals. He received royalties from  
9 McGraw Hill and Koninklijke Philips Electronics, N.V. for the Actiwatch-2 and Actiwatch-Spectrum  
10 devices. CC's interests were reviewed and managed by Brigham and Women's Hospital and  
11 Partners HealthCare in accordance with their conflict of interest policies.  
12

13 SR reports that he has served as a consultant through his institution to Vanda Pharmaceuticals,  
14 Philips Respironics, EdanSafe, The Australian Workers' Union, National Transport Commission,  
15 Transport Accident Commission, New South Wales Department of Education and Communities,  
16 and has through his institution received research grants and/or unrestricted educational grants  
17 from Vanda Pharmaceuticals, Shell, Teva Pharmaceuticals, Rio Tinto, Seeing Machines, Takeda  
18 Pharmaceuticals North America, Philips Lighting, Philips Respironics, Cephalon, and ResMed  
19 Foundation, and reimbursements for conference travel expenses from Vanda Pharmaceuticals. His  
20 institution has received equipment donations or other support from Optalert, Compumedics, and  
21 Tyco Healthcare. He has served as an expert witness and/or consultant to shift work organizations.  
22 SR also serves as a Program Leader in the Cooperative Research Centre for Alertness, Safety and  
23 Productivity.  
24

25 Funders had no role in the study design, data collection, data analysis, data interpretation, or  
26 writing of the report.  
27

28 **Ethical approval:** The protocol was approved by the Partners and Monash Human Research Ethics  
29 Committees. Participants provided written or electronic informed consent and were not informed  
30 about study hypotheses.  
31

32 **Data sharing statement:** The data that support the findings of this study are available from the  
33 authors upon reasonable request.  
34  
35  
36  
37  
38  
39  
40  
41  
42  
43  
44  
45  
46  
47  
48  
49  
50  
51  
52  
53  
54  
55  
56  
57  
58  
59  
60



## References

1. Institute of Medicine (US) Committee on Sleep Medicine and Research. Functional and economic impact of sleep loss and sleep-related disorders. In: Colten HR, Altevogt BM, Eds. Sleep disorders and sleep deprivation: an unmet public health problem. National Academies Press (US), Washington DC; 2006.
2. Drake CL, Roehrs T, Richardson G, Walsh JK, Roth T. Shift work sleep disorder: prevalence and consequences beyond that of symptomatic day workers. *Sleep* 2004; **27**: 1453–62.
3. Barger LK, Ogeil RP, Drake CL, O'Brien CS, Ng KT, Rajaratnam SM. Validation of a questionnaire to screen for shift work disorder. *Sleep* 2012; **35**: 1693–1703.
4. Rajaratnam SMW, Barger LK, Lockley SW, Shea SA, Wang W, Landrigan CP, et al. Sleep disorders, health, and safety in police officers. *JAMA* 2011; **306**: 2567–78.
5. Czeisler CA, Johnson MP, Duffy JF, Brown EN, Ronda JM, Kronauer RE. Exposure to bright light and darkness to treat physiologic maladaptation to night work. *N Engl J Med* 1990; **322**: 1253–9.
6. Van Dongen HPA. Shift work and inter-individual differences in sleep and sleepiness. *Chronobiol Int* 2006; **23**: 1139–47.
7. Åkerstedt T, Wright KP. Sleep loss and fatigue in shift work and shift work disorder. *Sleep Med Clin* 2009; **4**: 257–71.
8. Kalmbach DA, Pillai V, Cheng P, Arnedt JT, Drake CL. Shift work disorder, depression, and anxiety in the transition to rotating shifts: the role of sleep reactivity. *Sleep Med* 2015; **16**: 1532–8.
9. Dorrian J, Heath G, Sargent C, Banks S, Coates A. Alcohol use in shiftworkers. *Accid Anal Prev* 2017; **99**:395–400.
10. Dorrian J, Lamond N, van den Heuvel C, Pincombe J, Rogers AE, Dawson D. A pilot study of the safety implications of Australian nurses' sleep and work hours. *Chronobiol Int* 2006; **23**: 1149–63.
11. Schuckit MA. Alcohol-use disorders. *Lancet* 2009; **373**: 492–501.
12. Room R, Babor T, Rehm J. Alcohol and public health. *Lancet* 2005; **365**: 519–30.
13. Roche AM, Pidd K, Berry JG, Harrison JE. Workers' drinking patterns: the impact on absenteeism in the Australian workplace. *Addiction* 2008; **103**: 738–48.
14. Ogeil RP, Phillips JG. Commonly used stimulants: Sleep problems, dependence and psychological distress. *Drug Alcohol Depend* 2015; **153**: 145–51.
15. Liira J, Verbeek Jos H, Costa G, Driscoll Tim R, Sallinen M, Isotalo Leena K, et al. Pharmacological interventions for sleepiness and sleep disturbances caused by shift work. *Cochrane Database Syst Rev* 2014; Issue 8 DOI: 10.1002/14651858.CD009776.pub2
16. Vila B. Impact of long work hours on police officers and the communities they serve. *Am J Ind Med* 2006; **49**:972-980.
17. Schaufeli WB, Bakker AB, Hoogduin K, Schaap C, Kladler A. On the clinical validity of the Maslach burnout inventory and the burnout measure. *Psychol Health* 2001; **16**: 565–82.
18. Maslach C, Jackson SE, Leiter MP. Maslach burnout inventory manual. 3rd ed. Palo Alto CA: Consulting Psychologists Press; 1996.
19. Johns MW. Sensitivity and specificity of the multiple sleep latency test (MSLT), the maintenance of wakefulness test and the Epworth sleepiness scale: Failure of the MSLT as a gold standard. *J Sleep Res* 2000; **9**: 5–11.
20. Mitchell DC, Knight CA, Hockenberry J, Teplansky R, Hartman TJ. Beverage caffeine intakes in the U.S. *Food Chem Toxicol* 2014; **63**: 136–42.
21. Olfson M, King M, Schoenbaum M. Benzodiazepine use in the United States. *JAMA Psychiatry* 2015; **72**: 136–42
22. Barbone F, McMahon AD, Davey PG, Morris AD, Reid IC, McDevitt DG, et al. Association of road-traffic accidents with benzodiazepine use. *Lancet* 1998; **352**: 1331–6.

23. Daurat A, Sagaspe P, Moták L, Taillard J, Bayssac L, Huet N, et al. Lorazepam impairs highway driving performance more than heavy alcohol consumption. *Accid Anal Prev* 2013; **60**: 31–4.
24. Kay GG, Schwartz HI, Wingertzahn MA, Jayawardena S, Rosenberg RP. Next-day residual effects of gabapentin, diphenhydramine, and triazolam on simulated driving performance in healthy volunteers: a phase 3, randomized, double-blind, placebo-controlled, crossover trial. *Hum Psychopharmacol* 2016; **31**: 217–26.
25. Futenma K, Asaoka S, Takaesu Y, Komada Y, Ishikawa J, Murakoshi A, et al. Impact of hypnotics use on daytime function and factors associated with usage by female shift work nurses. *Sleep Med* 2015; **16**: 604–11.
26. Fulgoni VL, Keast DR, Lieberman HR. Trends in intake and sources of caffeine in the diets of US adults: 2001–2010. *Am J Clin Nutrition* 2015; **101**: 1081–1087.
27. Singh I, Bard I, Jackson, J. Robust Resilience and Substantial Interest: A Survey of Pharmacological Cognitive Enhancement among University Students in the UK and Ireland. *PLOS One* 2014; **9**: e105969
28. Walsh JK, Randazzo AC, Stone KL, Schweitzer PK. Modafinil improves alertness, vigilance, and executive function during simulated night shifts. *Sleep* 2004; **27**: 434–9.
29. Gurtman CG, Broadbear JH, Redman JR. Effects of modafinil on simulator driving and self-assessment of driving following sleep deprivation. *Hum Psychopharmacol* 2008; **23**: 681–92.
30. Schwartz JRL, Roth T. Shift Work Sleep Disorder. *Drugs* 2012; **66**: 2357–70.
31. National Transportation Safety Board (NTSB). Safety study: fatigue, alcohol, other drugs, and medical factors in fatal-to-the-driver heavy truck crashes (volume 1). NTSB. Washington DC; 1990.
32. van Amelsvoort LGPM, Jansen NWH, Kant I. Smoking among shift workers: more than a confounding factor. *Chronobiol Int* 2006; **23**: 1105–13.
33. Schernhammer ES, Feskanich D, Liang G, Han J. Rotating night-shift work and lung cancer risk among female nurses in the United States. *Am J Epidemiol* 2013; **178**: 1434–41.
34. Pedersen ER, Grow J, Duncan S, Neighbors C, Larimer ME. Concurrent validity of an online version of the Timeline Followback assessment. *Psychol Addict Behav* 2012; **26**, 672–677.

1  
2  
3 **Figure Captions:**  
4  
5  
6

7 **Figure 1.** Proportion of police officers reporting stress (A), burnout (B), fatigue-related errors (C) or non-  
8 fatigue errors (D) by use of drug. \* $p < .05$ , \*\* $p < .01$   
9

10  
11  
12 **Figure 2.** Proportion of police officers reporting excessive daytime sleepiness (A), near-misses (B), dozing  
13 during a drive following a night-shift (C) or day-shift (D) by use of drug. \* $p < .05$ , \*\* $p < .01$ .  
14  
15  
16  
17  
18  
19  
20  
21  
22  
23  
24  
25  
26  
27  
28  
29  
30  
31  
32  
33  
34  
35  
36  
37  
38  
39  
40  
41  
42  
43  
44  
45  
46  
47  
48  
49  
50  
51  
52  
53  
54  
55  
56  
57  
58  
59  
60

**Table 1. Use of sleep- and wake-promoting drugs (bold) and social drugs (italic) by police officers**

| <b>Drug / Class</b>                                          | <b>Categorisation for analysis (n, % valid responses)</b>                                                                                                                                                            |
|--------------------------------------------------------------|----------------------------------------------------------------------------------------------------------------------------------------------------------------------------------------------------------------------|
| <b>Wake-promoting drugs</b><br>(excl. caffeine and nicotine) | <i>Used in the past month</i><br>Yes (180, 5.4%)<br>No (3160, 94.6%)                                                                                                                                                 |
| <b>Sleep-promoting drugs</b>                                 | <i>Used in the past month</i><br>Yes (738, 21.6%)<br>No (2674, 78.4%)                                                                                                                                                |
| <b>Drugs with sleepiness as a side-effect</b>                | <i>Used in the past month</i><br>Yes (648, 19.5%)<br>No (2678, 80.5%)                                                                                                                                                |
| <i>Alcohol</i>                                               | <i>Risky alcohol use<sup>1</sup></i><br>Yes (180, 6.3%)<br>No (2709, 93.7%)                                                                                                                                          |
| <i>Caffeine</i>                                              | <i>Average consumption per day<sup>2</sup></i><br>None (366, 10.7%)<br>Low (2250, 66.0%)<br>High (793, 23.3%)                                                                                                        |
| <i>Nicotine (Cigarettes)</i>                                 | <i>Smoking Status</i><br>Smoked to stay awake (149, 4.2% of responses and 27.2% of smokers)<br>Smoked, but not to stay awake (398, 11.1% of responses and 72.8% of smokers)<br>Non-smoker (3028, 84.7% of responses) |

<sup>1</sup> USA limit for consumption: 196g/ week males (14 std drinks) & 98g/ week females (7 std drinks).  
A std drink contains 14g of alcohol

<sup>2</sup> High > 400mg of caffeine per day (5+ servings/day); Low ≤400mg per day (up to 4 servings).<sup>19</sup>

<sup>3</sup> n=98 (2.9%) of police officers reported use of a sleep-promoting/ drug with sleepiness as a side-effect and a wake-promoting drug in the past month.

**Table 2. Logistic regression models predicting study outcomes on sleepiness, near crashes, fatigue-related work errors, stress and burnout**

| Dependent Variable     | Model Chi-square (7df), sig value | Variance explained <sup>a</sup> | Significant predictors <sup>b</sup>         | OR (95% CI)       |
|------------------------|-----------------------------------|---------------------------------|---------------------------------------------|-------------------|
| ESS score >10          | 49.953, p<.001                    | .019-.026                       | Medication with sleepiness as a side effect | 1.58 (1.19, 2.10) |
|                        |                                   |                                 | Night shift work                            | 1.48 (1.22, 1.80) |
|                        |                                   |                                 | Wake promoting meds x night shift work      | 2.56 (1.19, 5.54) |
| Near crash             | 73.987, p<.001                    | .026-.038                       | Sleep promoting medication                  | 1.61 (1.21, 2.13) |
|                        |                                   |                                 | Medication with sleepiness as a side effect | 1.38 (1.04, 1.82) |
|                        |                                   |                                 | Night-shift work                            | 1.48 (1.20, 1.81) |
| Fatigue-related errors | 197.398, p<.001                   | .065-.091                       | Wake promoting medication                   | 1.68 (1.01, 2.79) |
|                        |                                   |                                 | Sleep promoting medication                  | 1.75 (1.32, 2.30) |
|                        |                                   |                                 | Medication with sleepiness as a side effect | 1.57 (1.19, 2.07) |
|                        |                                   |                                 | Night shift work                            | 2.40 (1.97, 2.92) |
| Stress <sup>c</sup>    | 58.297, p<.001                    | .025-.034                       | Wake promoting medication                   | 1.74 (1.06, 2.89) |
|                        |                                   |                                 | Sleep promoting medication                  | 1.41 (1.10, 1.82) |
|                        |                                   |                                 | Medication with sleepiness as a side effect | 1.39 (1.08, 1.78) |
|                        |                                   |                                 | Age                                         | .985(.976-.994)   |
| Burnout <sup>d</sup>   | 106.26, P<.001                    | .043-.058                       | Sleep promoting medication                  | 1.83 (1.40, 2.38) |
|                        |                                   |                                 | Medication with sleepiness as a side effect | 1.82 (1.40, 2.37) |
|                        |                                   |                                 | Age                                         | .989 (.98-.99)    |
|                        |                                   |                                 | Gender                                      | .78 (.64-.96)     |

<sup>a</sup>: Estimates here represent Cox & Snell R-Square and Nagelkerke R-square values

<sup>b</sup>: Predictors and levels entered into the model: wake medications: used in the past month vs not used, sleep medications: used in the past month vs not used, medication with sleepiness as a side effect: used in the past month vs not used, night-shifts: worked vs not. Only variables significantly contributing to the model are included in the table. Model controlled for age and gender.

<sup>c</sup>: Scores of 5-7 on a 7-point Likert-type scale

<sup>d</sup>: created using Maslach's burnout scale (emotional subscale) – scores of 18+ used to reflect moderate-high burnout

**Table 3. Logistic regression models predicting risky use of social drugs**

| Dependent Variable                           | Model Chi-square (7df), sig value | Variance explained <sup>a</sup> | Significant predictors <sup>b</sup>                             | OR (95% CI)                                                                     |
|----------------------------------------------|-----------------------------------|---------------------------------|-----------------------------------------------------------------|---------------------------------------------------------------------------------|
| High caffeine                                | 41.81, p<.001                     | .017-.026                       | Sleep-promoting medication<br>Night shift work<br>Gender<br>Age | 1.49 (1.12, 1.98)<br>1.42 (1.16, 1.74)<br>1.29 (1.02, 1.63)<br>1.02 (1.01-1.03) |
| Alcohol misuse <sup>c</sup>                  | Overall model not significant     |                                 |                                                                 |                                                                                 |
| Smokers who smoke to stay awake <sup>d</sup> | 23.759, p=.001                    | .008-.028                       | Sleep promoting medication<br>Night shift work                  | 1.97 (1.06, 3.64)<br>2.12 (1.34, 3.36)                                          |

<sup>a</sup>: Estimates here represent Cox & Snell R-Square and Nagelkerke R-square values

<sup>b</sup>: Predictors and levels entered into the model: wake medications: used in the past month vs not used, sleep medications: used in the past month vs not used, medication with sleepiness as a side effect: used in the past month vs not used, night-shifts: worked vs not. Only variables significantly contributing to the model are included in the table. Model controlled for age and gender

<sup>c</sup>: users who exceeded NIH/NIAAA limits for past week use

<sup>d</sup>: smokers who reported engaging in this behaviour in order to remain alert

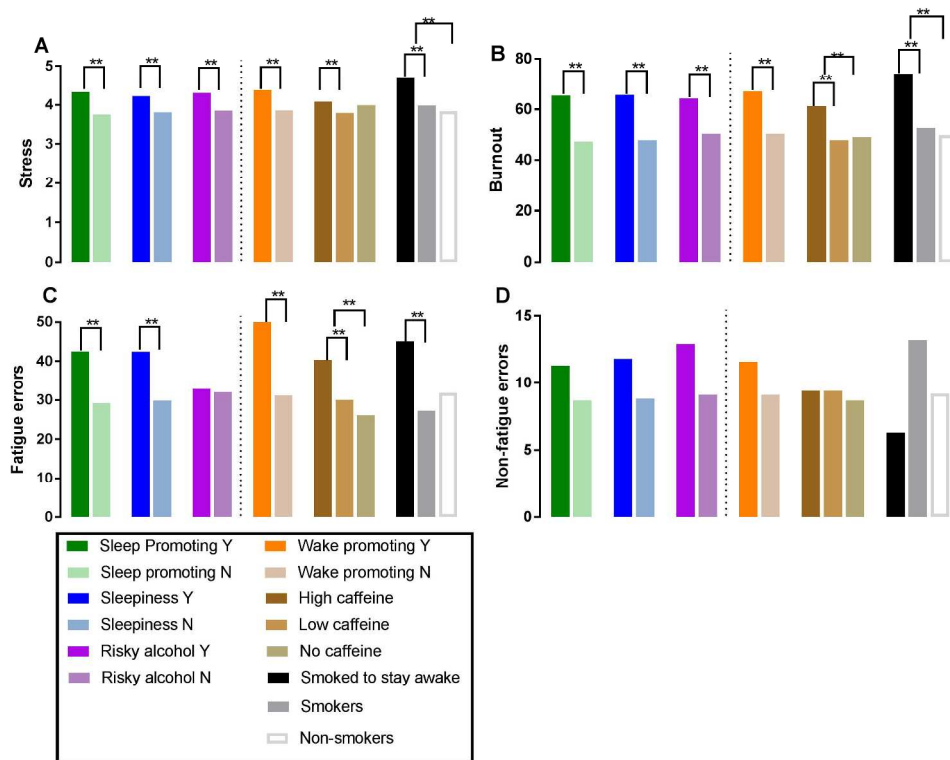

Figure 1. Proportion of police officers reporting stress (A), burnout (B), fatigue-related errors (C) or non-fatigue errors (D) by use of drug. \*p<.05, \*\*p<.01

262x212mm (300 x 300 DPI)

Only

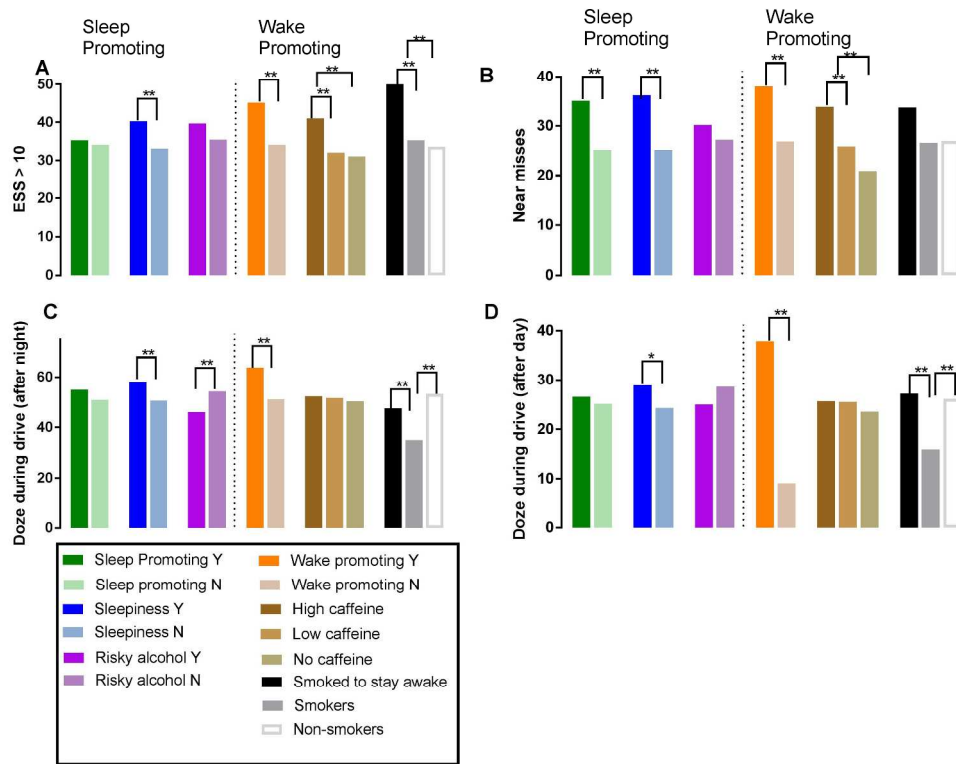

Figure 2. Proportion of police officers reporting excessive daytime sleepiness (A), near-misses (B), dozing during a drive following a night-shift (C) or day-shift (D) by use of drug. \* $p < .05$ , \*\* $p < .01$ .

269x218mm (300 x 300 DPI)

Only



**Supplementary Table 1. Logistic regression models predicting study outcomes controlling for OSA, insomnia and SWD diagnosis**

| Dependent Variable   | Model Chi-square (12df), sig value | Variance explained <sup>a</sup> | Significant predictors <sup>b</sup>         | OR (95% CI)       |
|----------------------|------------------------------------|---------------------------------|---------------------------------------------|-------------------|
| ESS score >10        | 137.91,<br>p<.001                  | .050-.069                       | Medication with sleepiness as a side effect | 1.50 (1.12, 2.00) |
|                      |                                    |                                 | Night shift work                            | 1.32 (1.09, 1.62) |
|                      |                                    |                                 | Wake-promoting meds x night shift work      | 2.48 (1.19, 5.54) |
|                      |                                    |                                 | Insomnia diagnosis                          | 1.67 (1.17, 2.40) |
|                      |                                    |                                 | OSA diagnosis                               | 1.87 (1.57, 2.21) |
|                      |                                    |                                 | SWD diagnosis                               | 2.42 (1.70, 3.45) |
| Near crash           | 111.47,<br>p<.001                  | .036-.053                       | Sleep-promoting medication                  | 1.52 (1.15, 2.02) |
|                      |                                    |                                 | Night shift work                            | 1.38 (1.12, 1.70) |
|                      |                                    |                                 | Age                                         | .99 (.98, 1.00)   |
|                      |                                    |                                 | Insomnia diagnosis                          | 1.57 (1.11, 2.22) |
|                      |                                    |                                 | OSA diagnosis                               | 1.45 (1.22, 1.73) |
|                      |                                    |                                 | SWD diagnosis                               | 1.61 (1.15, 2.25) |
| Fatigue errors       | 254.87,<br>p<.001                  | .081-.113                       | Sleep-promoting medication                  | 1.64 (1.24, 2.18) |
|                      |                                    |                                 | Medication with sleepiness as a side effect | 1.48 (1.12, 1.96) |
|                      |                                    |                                 | Night shift work                            | 2.18 (1.78, 2.67) |
|                      |                                    |                                 | Insomnia diagnosis                          | 1.68 (1.18, 2.38) |
|                      |                                    |                                 | OSA diagnosis                               | 1.54 (1.30, 1.83) |
|                      |                                    |                                 | SWD diagnosis                               | 2.06 (1.47, 2.89) |
| Stress <sup>c</sup>  | 115.94,<br>p<.001                  | .037-.051                       | Wake-promoting medication                   | 1.70 (1.03, 2.81) |
|                      |                                    |                                 | Sleep-promoting medication                  | 1.33 (1.03, 1.72) |
|                      |                                    |                                 | Medication with sleepiness as a side effect | 1.31 (1.02, 1.69) |
|                      |                                    |                                 | Night shift work                            | .78 (.64, .95)    |
|                      |                                    |                                 | Age                                         | .982 (.973-.992)  |
|                      |                                    |                                 | Gender                                      | .791 (.65, .97)   |
|                      |                                    |                                 | Insomnia diagnosis                          | 1.95 (1.38, 2.76) |
|                      |                                    |                                 | OSA diagnosis                               | 1.46 (1.24, 1.72) |
| SWD diagnosis        | 1.47 (1.05, 2.06)                  |                                 |                                             |                   |
| Burnout <sup>d</sup> | 262.33,<br>p<.001                  | .087-.12                        | Sleep-promoting medication                  | 1.68 (1.28, 2.21) |
|                      |                                    |                                 | Medication with sleepiness as a side effect | 1.67 (1.27, 2.19) |
|                      |                                    |                                 | Age                                         | .983 (.97-.99)    |
|                      |                                    |                                 | Gender                                      | .65 (.53-.80)     |
|                      |                                    |                                 | Insomnia diagnosis                          | 2.70 (1.78, 4.08) |
|                      |                                    |                                 | OSA diagnosis                               | 2.21 (1.86, 2.62) |
|                      |                                    |                                 | SWD diagnosis                               | 2.33 (1.61, 3.36) |

<sup>a</sup>: Estimates here represent Cox & Snell R-Square and Nagelkerke R-square values

<sup>b</sup>: Predictors and levels entered into the model: wake medications: used in the past month vs not used, sleep medications: used in the past month vs not used, medication with sleepiness as a side effect: used in the past month vs not used, night-shifts: worked vs not. Only variables significantly contributing to the model are included in the table. Model controlled for age, gender, and previous diagnosed OSA, insomnia or SWD.

<sup>c</sup>: Scores of 5-7 on a 7-point Likert-type scale

<sup>d</sup>: created using Maslach's burnout scale (emotional subscale) – scores of 18+ used to reflect moderate-high burnout

- 1
- 2
- 3
- 4
- 5
- 6
- 7
- 8
- 9
- 10
- 11
- 12
- 13
- 14
- 15
- 16
- 17
- 18
- 19
- 20
- 21
- 22
- 23
- 24
- 25
- 26
- 27
- 28
- 29
- 30
- 31
- 32
- 33
- 34
- 35
- 36
- 37
- 38
- 39
- 40
- 41
- 42
- 43
- 44
- 45
- 46
- 47
- 48
- 49
- 50
- 51
- 52
- 53
- 54
- 55
- 56
- 57
- 58
- 59
- 60

For peer review only

STROBE Statement – items identified by page number in bold.

|                              | <b>Item No</b> | <b>Recommendation</b>                                                                                                                                                                                                                                                                                                                                                                                                                                                      |
|------------------------------|----------------|----------------------------------------------------------------------------------------------------------------------------------------------------------------------------------------------------------------------------------------------------------------------------------------------------------------------------------------------------------------------------------------------------------------------------------------------------------------------------|
| <b>Title and abstract</b>    | 1              | (a) Indicate the study's design with a commonly used term in the title or the abstract<br><b>(Pages 1 and 2)</b><br>(b) Provide in the abstract an informative and balanced summary of what was done and what was found<br><b>(Page 2)</b>                                                                                                                                                                                                                                 |
| <b>Introduction</b>          |                |                                                                                                                                                                                                                                                                                                                                                                                                                                                                            |
| Background/rationale         | 2              | Explain the scientific background and rationale for the investigation being reported<br><b>(page 3)</b>                                                                                                                                                                                                                                                                                                                                                                    |
| Objectives                   | 3              | State specific objectives, including any prespecified hypotheses<br><b>(page 4)</b>                                                                                                                                                                                                                                                                                                                                                                                        |
| <b>Methods</b>               |                |                                                                                                                                                                                                                                                                                                                                                                                                                                                                            |
| Study design                 | 4              | Present key elements of study design early in the paper<br><b>(page 4)</b>                                                                                                                                                                                                                                                                                                                                                                                                 |
| Setting                      | 5              | Describe the setting, locations, and relevant dates, including periods of recruitment, exposure, follow-up, and data collection<br><b>(page 4)</b>                                                                                                                                                                                                                                                                                                                         |
| Participants                 | 6              | <i>Cross-sectional study</i> —Give the eligibility criteria, and the sources and methods of selection of participants <b>(page 4 + reference)</b>                                                                                                                                                                                                                                                                                                                          |
| Variables                    | 7              | Clearly define all outcomes, exposures, predictors, potential confounders, and effect modifiers. Give diagnostic criteria, if applicable<br><b>(pages 4 +5)</b>                                                                                                                                                                                                                                                                                                            |
| Data sources/<br>measurement | 8*             | For each variable of interest, give sources of data and details of methods of assessment (measurement). Describe comparability of assessment methods if there is more than one group<br><b>(page 4)</b>                                                                                                                                                                                                                                                                    |
| Bias                         | 9              | Describe any efforts to address potential sources of bias<br><b>(page 5, data analysis)</b>                                                                                                                                                                                                                                                                                                                                                                                |
| Study size                   | 10             | Explain how the study size was arrived at<br><b>(page 4)</b>                                                                                                                                                                                                                                                                                                                                                                                                               |
| Quantitative variables       | 11             | Explain how quantitative variables were handled in the analyses. If applicable, describe which groupings were chosen and why<br><b>(page 5)</b>                                                                                                                                                                                                                                                                                                                            |
| Statistical methods          | 12             | (a) Describe all statistical methods, including those used to control for confounding<br><b>(page 5)</b><br>(b) Describe any methods used to examine subgroups and interactions<br><b>(page 5)</b><br>(c) Explain how missing data were addressed<br><b>(page 5)</b><br><i>Cross-sectional study</i> —If applicable, describe analytical methods taking account of sampling strategy- <b>(page 4 + reference)</b><br>(e) Describe any sensitivity analyses <b>(page 5)</b> |

1  
2  
3  
4  
5  
6  
7  
8  
9  
10  
11  
12  
13  
14  
15  
16  
17  
18  
19  
20  
21  
22  
23  
24  
25  
26  
27  
28  
29  
30  
31  
32  
33  
34  
35  
36  
37  
38  
39  
40  
41  
42  
43  
44  
45  
46  
47  
48  
49  
50  
51  
52  
53  
54  
55  
56  
57  
58  
59  
60

Continued on next page

For peer review only

**Results**

|                  |     |                                                                                                                                                                                                                                                                                                                                                                                                                                                                        |
|------------------|-----|------------------------------------------------------------------------------------------------------------------------------------------------------------------------------------------------------------------------------------------------------------------------------------------------------------------------------------------------------------------------------------------------------------------------------------------------------------------------|
| Participants     | 13* | (a) Report numbers of individuals at each stage of study—eg numbers potentially eligible, examined for eligibility, confirmed eligible, included in the study, completing follow-up, and analysed ( <b>page 4 + reference</b> )<br>(b) Give reasons for non-participation at each stage ( <b>page 4 + reference</b> )<br>(c) Consider use of a flow diagram <b>n/a</b>                                                                                                 |
| Descriptive data | 14* | (a) Give characteristics of study participants (eg demographic, clinical, social) and information on exposures and potential confounders – <b>page 5</b><br>(b) Indicate number of participants with missing data for each variable of interest- <b>tables</b><br>(c) <i>Cohort study</i> —Summarise follow-up time (eg, average and total amount) <b>n/a</b>                                                                                                          |
| Outcome data     | 15* | <i>Cross-sectional study</i> —Report numbers of outcome events or summary measures ( <b>page 5+6</b> )                                                                                                                                                                                                                                                                                                                                                                 |
| Main results     | 16  | (a) Give unadjusted estimates and, if applicable, confounder-adjusted estimates and their precision (eg, 95% confidence interval). Make clear which confounders were adjusted for and why they were included – <b>pages 5,6 and tables</b><br>(b) Report category boundaries when continuous variables were categorized- <b>tables</b><br>(c) If relevant, consider translating estimates of relative risk into absolute risk for a meaningful time period- <b>n/a</b> |
| Other analyses   | 17  | Report other analyses done—eg analyses of subgroups and interactions, and sensitivity analyses- <b>page 6 and tables</b>                                                                                                                                                                                                                                                                                                                                               |

**Discussion**

|                  |    |                                                                                                                                                                                                |
|------------------|----|------------------------------------------------------------------------------------------------------------------------------------------------------------------------------------------------|
| Key results      | 18 | Summarise key results with reference to study objectives ( <b>page 6+7</b> )                                                                                                                   |
| Limitations      | 19 | Discuss limitations of the study, taking into account sources of potential bias or imprecision. Discuss both direction and magnitude of any potential bias ( <b>page 9</b> )                   |
| Interpretation   | 20 | Give a cautious overall interpretation of results considering objectives, limitations, multiplicity of analyses, results from similar studies, and other relevant evidence ( <b>page 8+9</b> ) |
| Generalisability | 21 | Discuss the generalisability (external validity) of the study results ( <b>page 8+9</b> )                                                                                                      |

**Other information**

|         |    |                                                                                                                                                                                  |
|---------|----|----------------------------------------------------------------------------------------------------------------------------------------------------------------------------------|
| Funding | 22 | Give the source of funding and the role of the funders for the present study and, if applicable, for the original study on which the present article is based ( <b>page 10</b> ) |
|---------|----|----------------------------------------------------------------------------------------------------------------------------------------------------------------------------------|

\*Give information separately for cases and controls in case-control studies and, if applicable, for exposed and unexposed groups in cohort and cross-sectional studies.

**Note:** An Explanation and Elaboration article discusses each checklist item and gives methodological background and published examples of transparent reporting. The STROBE checklist is best used in conjunction with this article (freely available on the Web sites of PLoS Medicine at <http://www.plosmedicine.org/>, Annals of Internal Medicine at <http://www.annals.org/>, and Epidemiology at <http://www.epidem.com/>). Information on the STROBE Initiative is available at [www.strobe-statement.org](http://www.strobe-statement.org).
