# Supplementary material for: Cross-sectional analysis of sleep-promoting and wake-promoting drug use on health, fatigue-related error, and near-crashes in police officers
Source: PubMed Central journal article supplement — BMJ Open. 2018 Sep 19;8(9):e022041. doi: 10.1136/bmjopen-2018-022041 (PMC6150149; doi:10.1136/bmjopen-2018-022041), 2018-09-19
Supplement: bmjopen-2018-022041supp001.pdf [file bmjopen-2018-022041supp001.pdf]

**Supplementary Table 1. Logistic regression models predicting study outcomes controlling for OSA, insomnia and SWD diagnosis**

| <b>Dependent Variable</b>                   | <b>Model Chi-square (12df), sig value</b> | <b>Variance explained <sup>a</sup></b> | <b>Significant predictors <sup>b</sup></b>  | <b>OR (95% CI)</b> |
|---------------------------------------------|-------------------------------------------|----------------------------------------|---------------------------------------------|--------------------|
| ESS score >10                               | 137.91,<br>p<.001                         | .050-.069                              | Medication with sleepiness as a side effect | 1.50 (1.12, 2.00)  |
|                                             |                                           |                                        | Night shift work                            | 1.32 (1.09, 1.62)  |
|                                             |                                           |                                        | Wake-promoting meds x night shift work      | 2.48 (1.19, 5.54)  |
|                                             |                                           |                                        | Insomnia diagnosis                          | 1.67 (1.17, 2.40)  |
|                                             |                                           |                                        | OSA diagnosis                               | 1.87 (1.57, 2.21)  |
|                                             |                                           |                                        | SWD diagnosis                               | 2.42 (1.70, 3.45)  |
|                                             |                                           |                                        | Near crash                                  | 111.47,<br>p<.001  |
| Night shift work                            | 1.38 (1.12, 1.70)                         |                                        |                                             |                    |
| Age                                         | .99 (.98, 1.00)                           |                                        |                                             |                    |
| Insomnia diagnosis                          | 1.57 (1.11, 2.22)                         |                                        |                                             |                    |
| OSA diagnosis                               | 1.45 (1.22, 1.73)                         |                                        |                                             |                    |
| SWD diagnosis                               | 1.61 (1.15, 2.25)                         |                                        |                                             |                    |
| Fatigue errors                              | 254.87,<br>p<.001                         | .081-.113                              |                                             |                    |
|                                             |                                           |                                        | Medication with sleepiness as a side effect | 1.48 (1.12, 1.96)  |
|                                             |                                           |                                        | Night shift work                            | 2.18 (1.78, 2.67)  |
|                                             |                                           |                                        | Insomnia diagnosis                          | 1.68 (1.18, 2.38)  |
|                                             |                                           |                                        | OSA diagnosis                               | 1.54 (1.30, 1.83)  |
|                                             |                                           |                                        | SWD diagnosis                               | 2.06 (1.47, 2.89)  |
|                                             |                                           |                                        | Stress <sup>c</sup>                         | 115.94,<br>p<.001  |
| Sleep-promoting medication                  | 1.33 (1.03, 1.72)                         |                                        |                                             |                    |
| Medication with sleepiness as a side effect | 1.31 (1.02, 1.69)                         |                                        |                                             |                    |
| Night shift work                            | .78 (.64, .95)                            |                                        |                                             |                    |
| Age                                         | .982(.973-.992)                           |                                        |                                             |                    |
| Gender                                      | .791 (.65, .97)                           |                                        |                                             |                    |
| Insomnia diagnosis                          | 1.95 (1.38, 2.76)                         |                                        |                                             |                    |
| OSA diagnosis                               | 1.46 (1.24, 1.72)                         |                                        |                                             |                    |
| SWD diagnosis                               | 1.47 (1.05, 2.06)                         |                                        |                                             |                    |
| Burnout <sup>d</sup>                        | 262.33,<br>p<.001                         | .087-.12                               | Sleep-promoting medication                  | 1.68 (1.28, 2.21)  |
|                                             |                                           |                                        | Medication with sleepiness as a side effect | 1.67 (1.27, 2.19)  |
|                                             |                                           |                                        | Age                                         | .983 (.97-.99)     |
|                                             |                                           |                                        | Gender                                      | .65 (.53-.80)      |
|                                             |                                           |                                        | Insomnia diagnosis                          | 2.70 (1.78, 4.08)  |
|                                             |                                           |                                        | OSA diagnosis                               | 2.21 (1.86,2.62)   |
|                                             |                                           |                                        | SWD diagnosis                               | 2.33 (1.61, 3.36)  |

<sup>a</sup>: Estimates here represent Cox & Snell R-Square and Nagelkerke R-square values

<sup>b</sup>: Predictors and levels entered into the model: wake medications: used in the past month vs not used, sleep medications: used in the past month vs not used, medication with sleepiness as a side effect: used in the past month vs not used, night-shifts: worked vs not. Only variables significantly contributing to the model are included in the table. Model controlled for age, gender, and previous diagnosed OSA, insomnia or SWD.

<sup>c</sup>: Scores of 5-7 on a 7-point Likert-type scale

<sup>d</sup>: created using Maslach's burnout scale (emotional subscale) – scores of 18+ used to reflect moderate-high burnout
